# Supplementary material
Source: HighWire-hosted journal article supplement (https://erj.ersjournals.com/content/54/3/1900382)
Supplement: inline-supplementary-material-1 [file inline-supplementary-material-1.pdf]

## ***Tracheomalacia and bronchomalacia in children (TF-2016-21)***

**TOPIC ALLOCATION July 2017. Key question numbers and final section headings**

| <b>QUESTION AND FINAL TOPIC HEADING</b>                                                                                                                                                                 | <b>RESPONSIBLE TF MEMBERS</b>         |
|---------------------------------------------------------------------------------------------------------------------------------------------------------------------------------------------------------|---------------------------------------|
| 1. What is the definition of tracheal (TM) and major bronchial malacia (BM) and what classifications of severity exist?<br>INTRODUCTION                                                                 | Deborah Snijders<br>Kostas Douros     |
| 2. What are the causes of tracheo-bronchomalacia (TBM)?<br>CONDITIONS ASSOCIATED WITH TBM                                                                                                               | Ahmad Kantar<br>Andrew Bush           |
| 3. What is the spectrum of clinical presentation, severity and clinical course – to include any studies on the untreated natural history of this condition?<br>CLINICAL SYMPTOMS AND SIGNS              | Ernst Eber<br>Rafaella Nenna          |
| 4a. In children suspected of having TBM, can pulmonary function tests be used to diagnose TBM<br>4b. In children with known TBM, what are the pulmonary function abnormalities<br>ROLE OF LUNG FUNCTION | Ann Chang<br>Ahmad Kantar             |
| 5. How do we use Imaging to diagnose TM & BM? [To include tracheobronchography]<br>ROLE OF IMAGING                                                                                                      | Efthymia Alexopoulou<br>Derek Roebuck |
| 6a. How do we use Bronchoscopy [rigid and flexible] to diagnose TM & BM?<br>6b. What influence does a general anaesthetic have on the diagnostic testing for TBM<br>ROLE OF BRONCHOSCOPY                | Fabio Midulla<br>Kostas Douros        |
| 7. Which medical therapies have been suggested for the management of TBM and co-morbidities [e.g. wheezing, endobronchial infection, atelectasis?]<br>MEDICAL THERAPIES                                 | Jayesh Bhatt<br>Andrew Bush           |
| 8. What is the role for respiratory physiotherapy?<br>PHYSIOTHERAPY                                                                                                                                     | Anna-Maria Charatsi<br>Julie Depiazzi |
| 9. How and when should we treat TM & BM by internal stenting?<br>SURGERY INCLUDING STENTING                                                                                                             | Derek Roebuck<br>Juan Anton-Pacheco   |
| 10. What surgical strategies have been suggested for the management of TBM – eg aortopexy, tracheopexy, external splints, tracheal resection, tracheostomy.<br>SURGERY INCLUDING STENTING               | Juan Anton-Pacheco                    |
| 11. What is the indication for long term ventilatory support either by tracheostomy or non-invasive interface and what ventilator strategies have been trialled?<br>VENTILATORY SUPPORT                 | Mark Everard<br>Ian Brent Masters     |
| 12. What is the parent and patient perspective?<br>PARENT AND PATIENT PERSPECTIVE                                                                                                                       | Courtney Coleman<br>Barbara Johnson   |

PRISMA for question 1 and 2

Pubmed search (since 1992)

(Tracheomalacia OR Bronchomalacia OR Tracheobronchomalacia) AND (classify OR classification OR define OR definition)

82 articles  
identified

screened for  
potential  
eligibility

20 articles

10 additional  
articles  
located by  
hand search in  
the references  
(2 of them  
before 1992)

30 articles in  
total

16 children or  
children/adults  
14 adults

11 original  
articles  
19 reviews

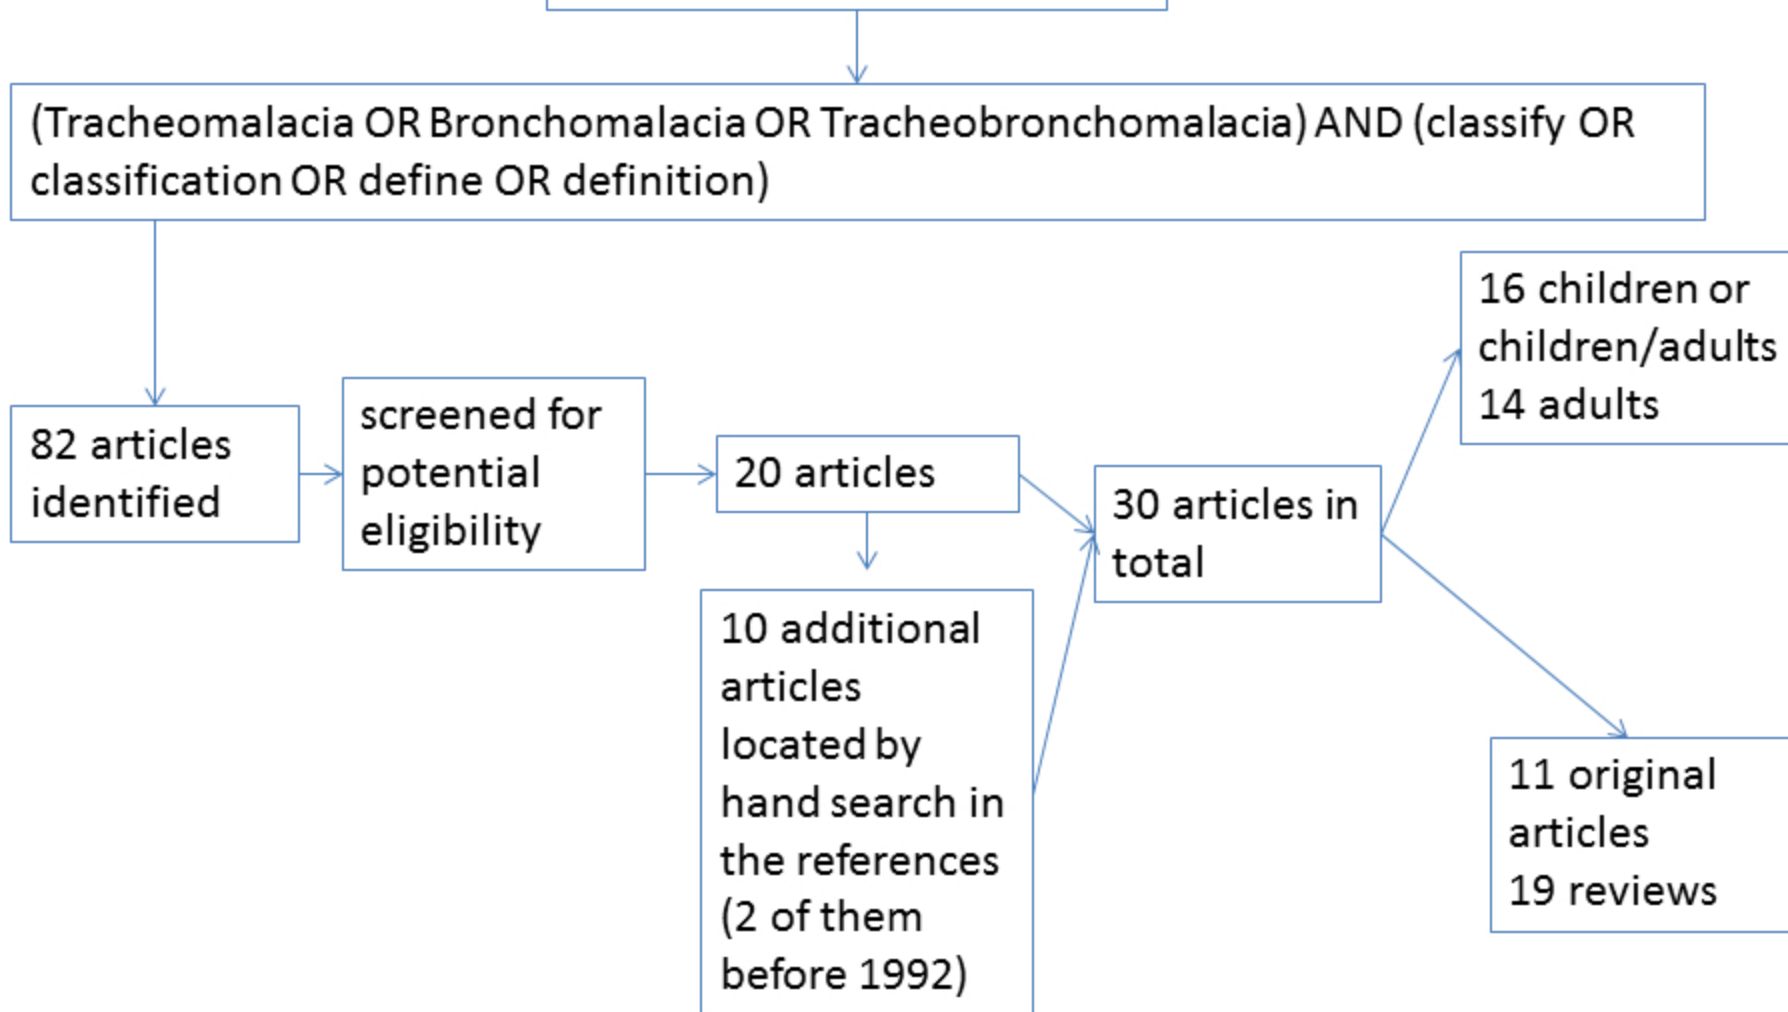

**PRISMA: QUESTION 3**  
Clinical Symptoms and Signs

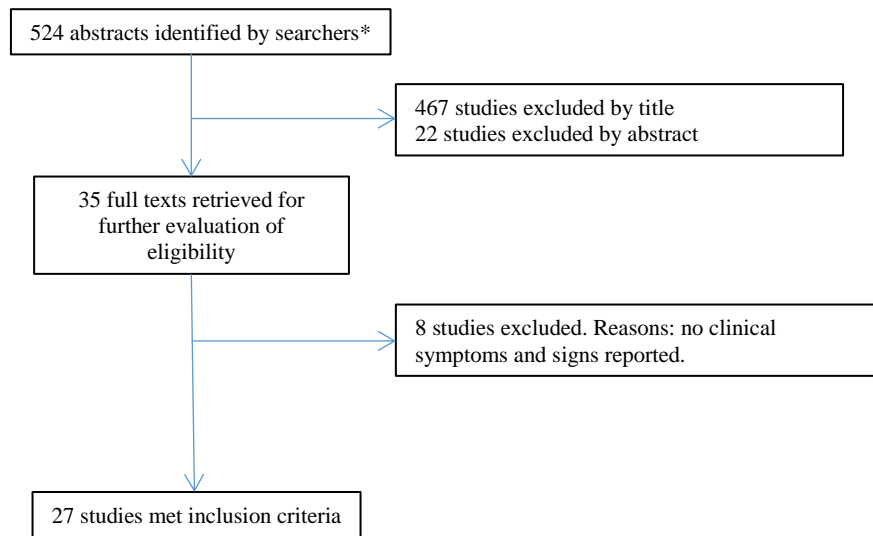

**\*Keywords:**

(tracheomalacia or bronchomalacia) and (symptoms or "clinical presentation" or "severity" or "clinical course" or "natural history")

**Limited to:**

**Publication dates:** from 01/01/1997 to 01/06/2017

**Species:** Humans

**Languages:** English

**Figure 4a:** Selection of studies that addressed key question (KQ) 4

4a. In children suspected of having TBM, can pulmonary function tests be used to diagnose TBM

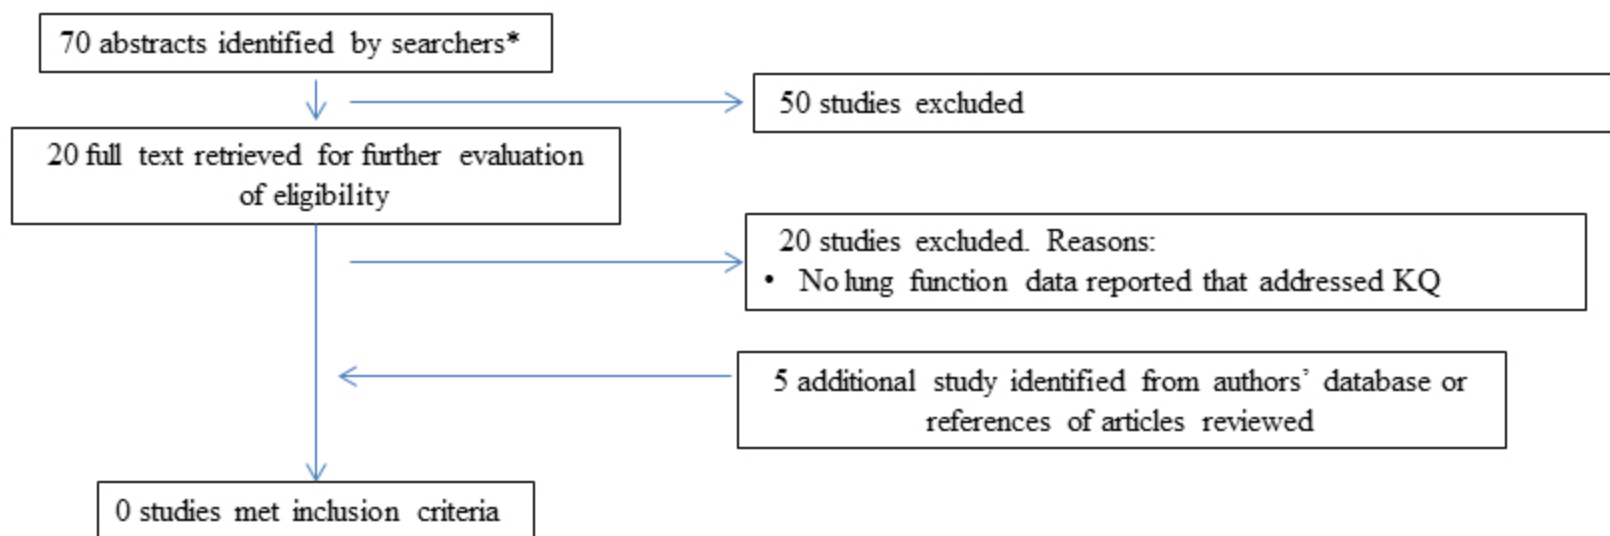

Search on Pubmed (3<sup>rd</sup> Aug 2017)

("tracheomalacia"[MeSH Terms] OR "tracheomalacia"[All Fields]) AND ("child"[MeSH Terms] OR "child"[All Fields] OR "children"[All Fields]) AND ("respiratory physiological phenomena"[MeSH Terms] OR ("respiratory"[All Fields] AND "physiological"[All Fields] AND "phenomena"[All Fields]) OR "respiratory physiological phenomena"[All Fields] OR ("lung"[All Fields] AND "function"[All Fields]) OR "lung function"[All Fields])

### **PRISMA FOR QUESTION 4B**

In children with known TBM, what are the pulmonary function abnormalities

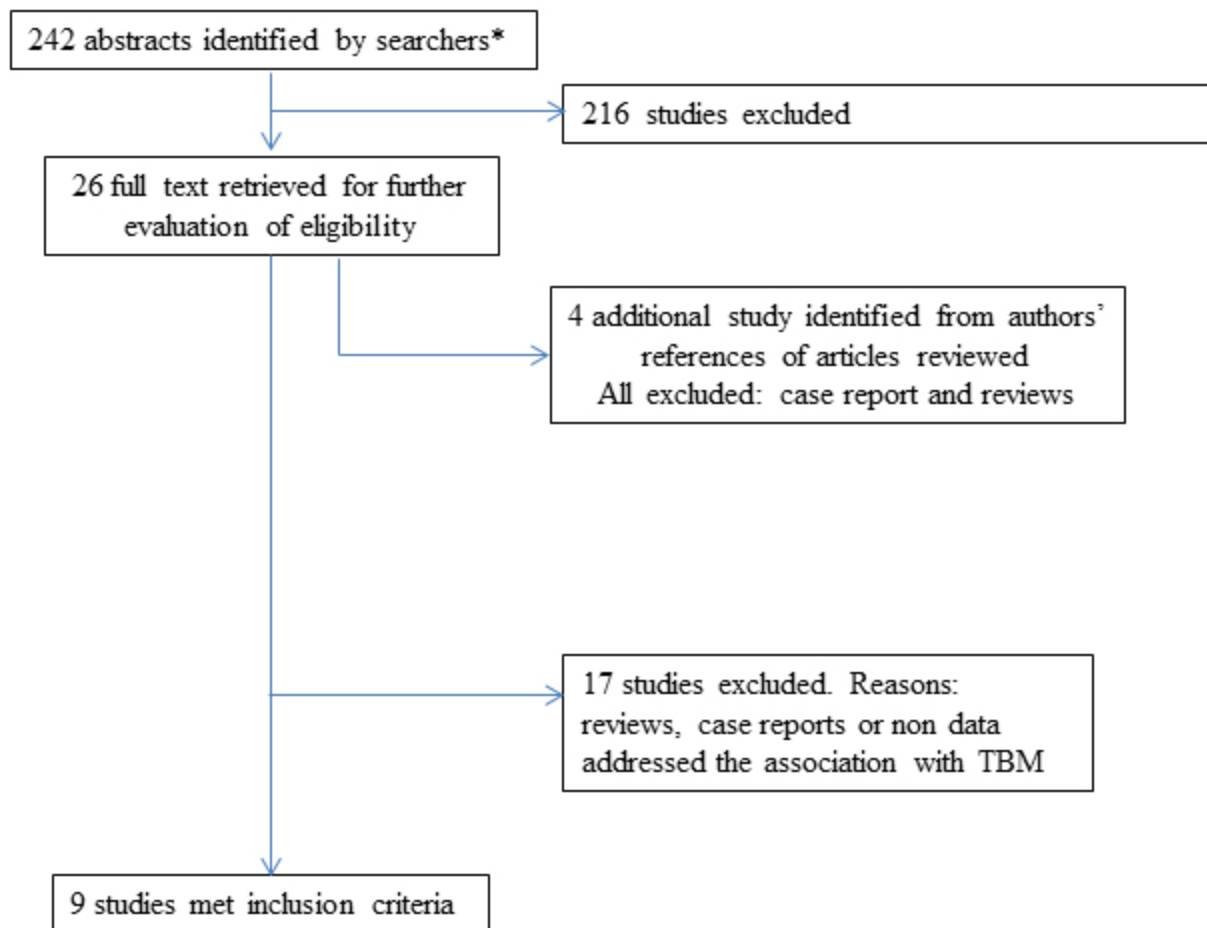

Search on Pubmed (3<sup>rd</sup> Aug 2017)

("tracheomalacia"[MeSH Terms] OR "tracheomalacia"[All Fields]) OR  
("bronchomalacia"[MeSH Terms] OR "bronchomalacia"[All Fields]) OR  
("tracheobronchomalacia"[MeSH Terms] OR "tracheobronchomalacia"[All Fields]) AND ("child"[MeSH Terms] OR "child"[All Fields] OR "children"[All Fields]) AND "infant"[MeSH Terms] OR ("infant"[All Fields])

Selection of studies that addressed key question (KQ) 5  
5. How do we use Imaging to diagnose TM & BM? [To include tracheobronchography]

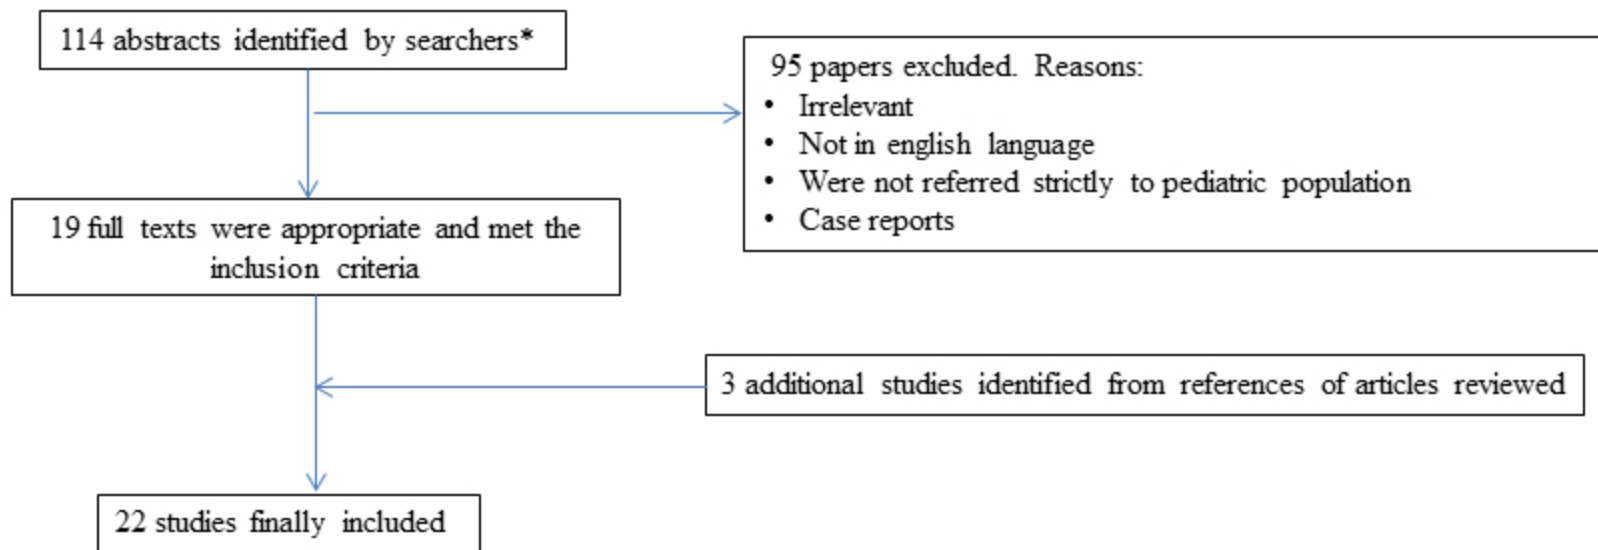

\*Search on PubMed (1/1/1997 – 26/8/2017), all the type of articles:

Keywords:

All the possible combinations of: TRACHEOMALACIA, BRONCHOMALACIA, IMAGING, CHILDREN, PEDIATRIC, CT, CT SCAN, MRI, FLUOROSCOPY, RADIOLOGY, BRONCHOGRAPHY

## PRISMA QUESTION 7

Which medical therapies have been suggested for the management of TBM and co-morbidities [e.g. wheezing, endobronchial infection, atelectasis?]

64 abstracts identified by searchers\*

Excluded 38 citations from abstracts as not relevant or case reports

26 papers retrieved for further evaluation of eligibility

14 papers excluded. Reasons: Not relevant to the KQ

12 additional citations identified from authors' database or references of articles reviewed

24 studies included for this section

Search on Pubmed (10<sup>th</sup> August 2017)

("tracheomalacia"[MeSH Terms] OR "tracheomalacia"[All Fields]) ("tracheobronchomalacia [MeSH Terms] OR "tracheobronchomalacia"[All Fields])" AND ("child"[MeSH Terms] OR "child"[All Fields] OR "children"[All Fields]) AND ("symptoms"[MeSH Terms] OR ("treatment"[All Fields])

=320 items  
Filters activated: Publication date from 1997/01/01 to 2017/12/31, Humans, English.  
= 241 items

### **Excluded:**

Diagnosis

Respiratory physiotherapy

Internal stenting

Surgical strategies eg aortopexy, tracheopexy, external splints, tracheal resection, tracheostomy

Long term ventilatory support either by tracheostomy or non-invasive interface

Adults

= 177 excluded

## PRISMA QUESTION 8 - PHYSIOTHERAPY

### Search terms

Tracheomalacia OR bronchomalacia OR tracheobronchomalacia OR malacia OR tracheal abnormalities OR tracheal diseases

### **AND**

Physiotherapy OR physical therapy OR physical therapy modalities OR airway clearance OR positive pressure and physiotherapy

Exercise tolerance OR exercise therapy

Administration inhalation OR nebulisation OR saline solution hypertonic OR deoxyribonuclease I OR nebulised dornase alfa OR nebulised hypertonic saline

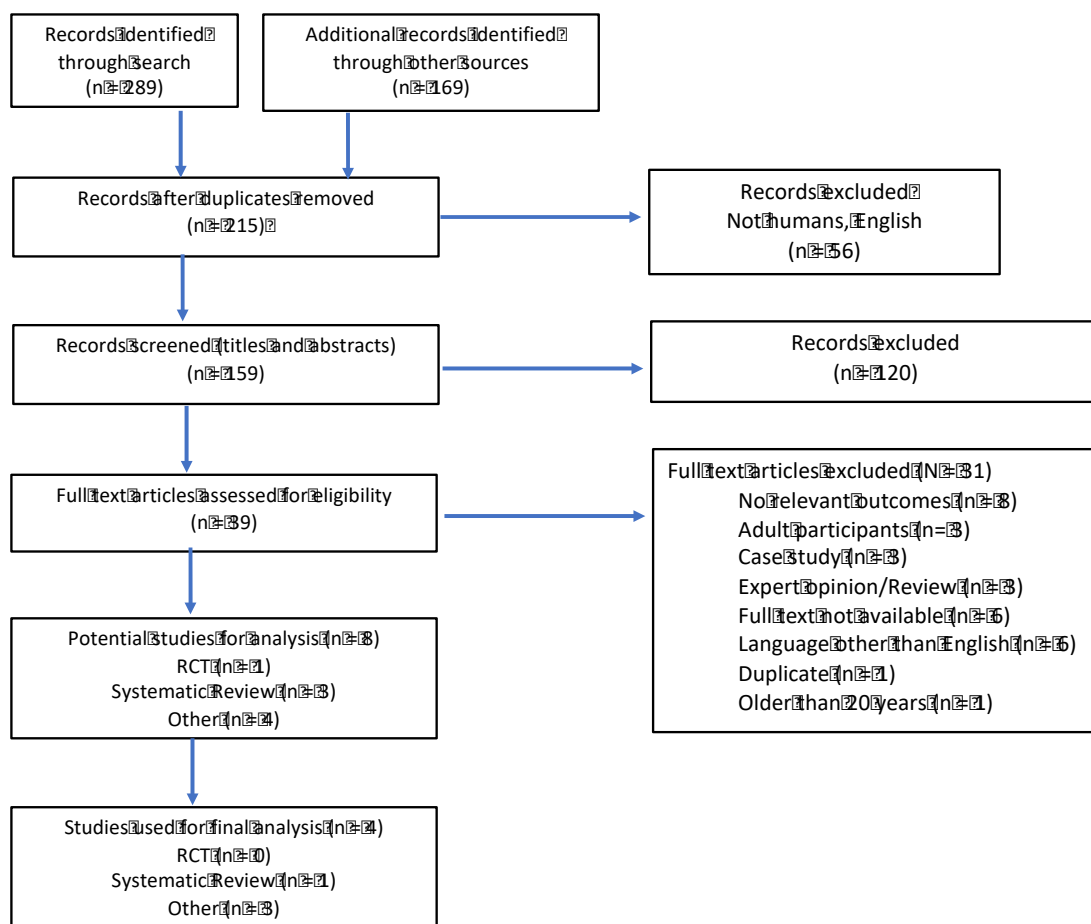



## PRISMA. QUESTION 9: STENTS

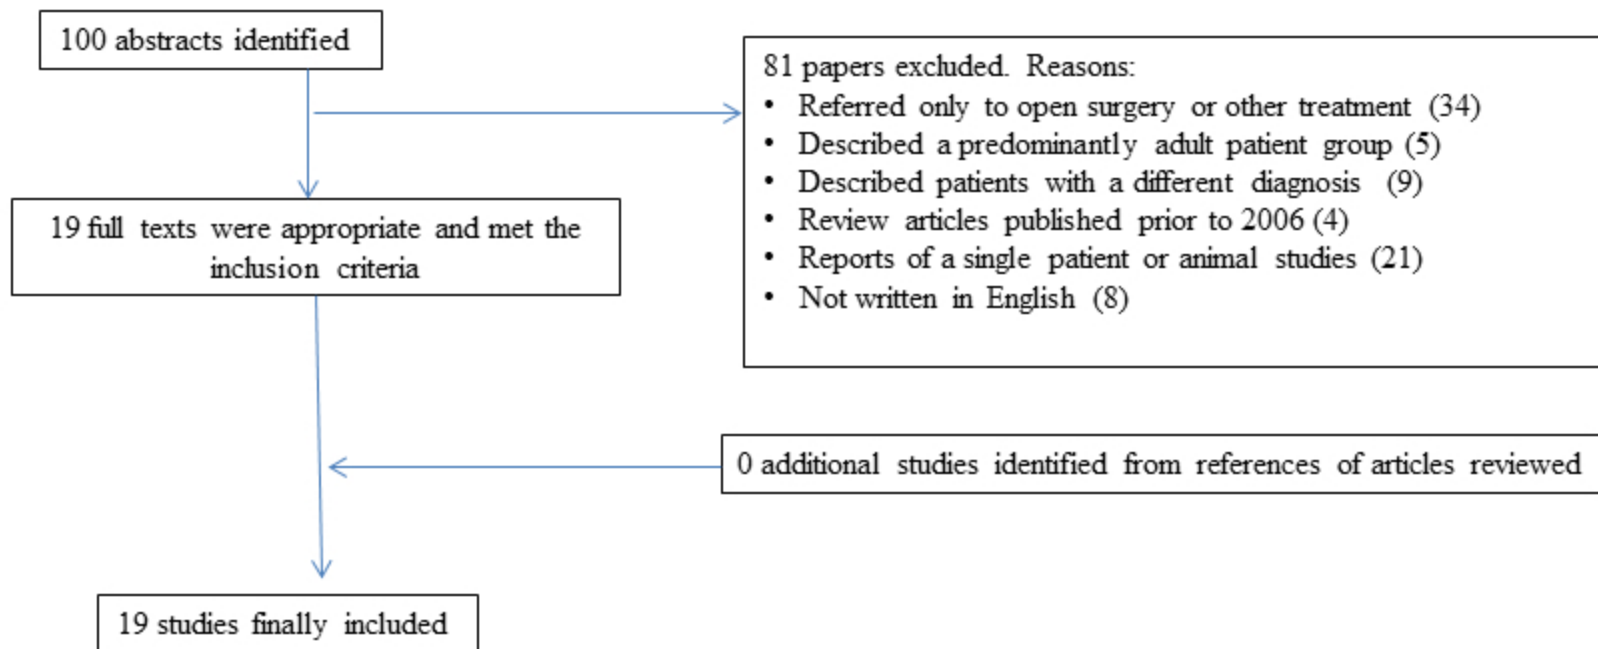

Search on PubMed 30-06-2018

PubMed search: (tracheomalacia OR tracheobronchomalacia OR bronchomalacia) AND stent  
limits: age 0-18 years

## PRISMA for question 10:

### What surgical strategies have been suggested for the management of TBM

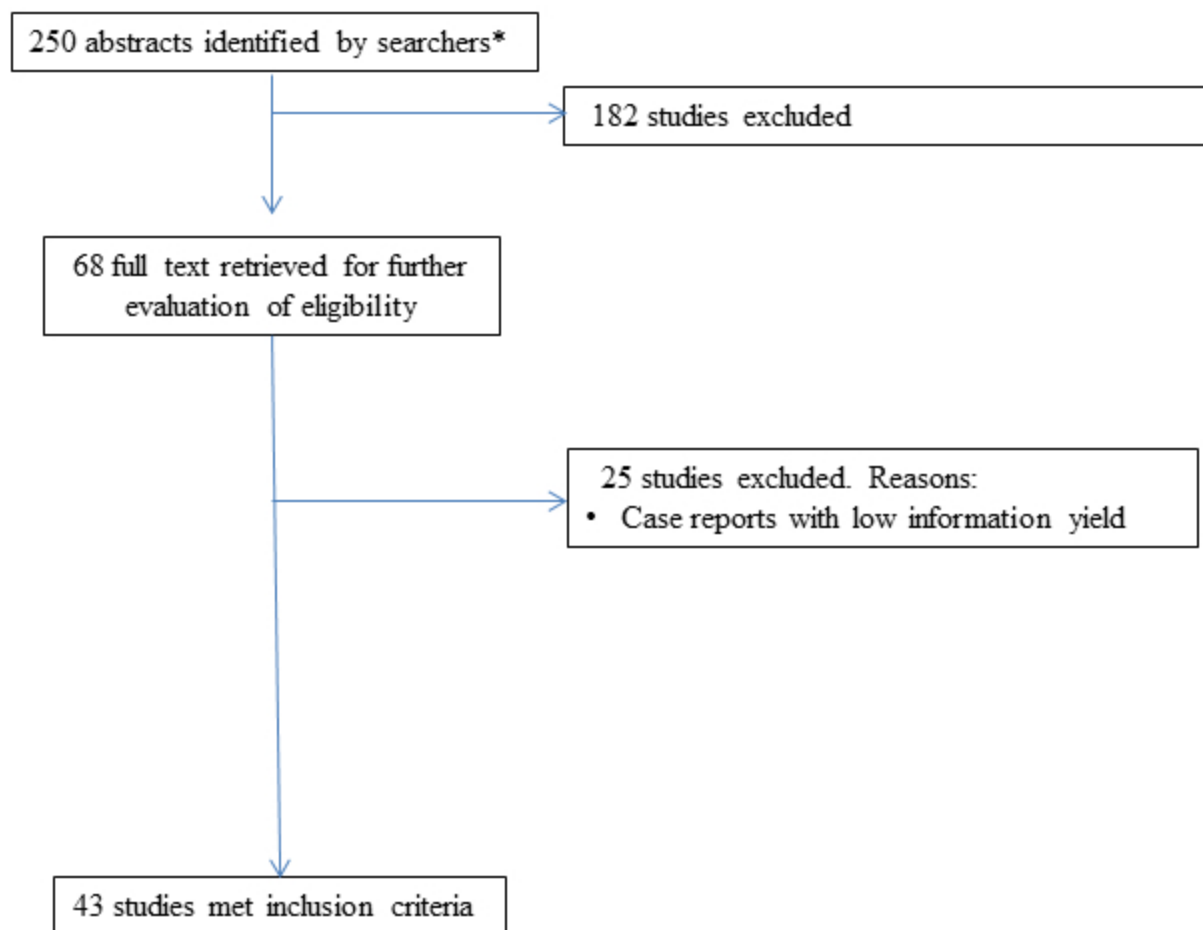

#### Search on Pubmed and Embase (September 2017)

"tracheomalacia/surgery"[MeSH Terms] OR "bronchomalacia/surgery"[MeSH]  
AND ("child"[MeSH Terms] OR "infant" (MeSH) OR "adolescent"[MeSH] OR  
"children"[All Fields]) AND ("aortopexy OR tracheopexy OR external splint OR  
tracheal resection OR Tracheostomy" [MeSH Terms] OR the combination of  
the above items.

### Question 3: Clinical Symptoms and Signs

| 1 <sup>st</sup> author, publication year | Setting; Study design                   | Inclusion criteria; Exclusion or definitions                                                                                                                                                                                                       | Description of cohort                              | Main aim(s) of study                                                                                                                                                                                                                                                                                  | Primary findings relating to KQ              | Main study limitation                                        | Method of confirmation of TBM and type                                                                                                                                                                                    |
|------------------------------------------|-----------------------------------------|----------------------------------------------------------------------------------------------------------------------------------------------------------------------------------------------------------------------------------------------------|----------------------------------------------------|-------------------------------------------------------------------------------------------------------------------------------------------------------------------------------------------------------------------------------------------------------------------------------------------------------|----------------------------------------------|--------------------------------------------------------------|---------------------------------------------------------------------------------------------------------------------------------------------------------------------------------------------------------------------------|
| <b>Adil 2012</b>                         | Tertiary referral centre; retrospective | 130 consecutive preterm and term infants with laryngomalacia, as diagnosed by airway endoscopy between June 2004 and August 2009                                                                                                                   | TM: 25 infants                                     | 1 “to identify the most common area(s) of supraglottic collapse”<br>2 “to compare airway findings in term and preterm infants”<br>3 “to evaluate the incidence of secondary airway lesions”                                                                                                           | 19% of infants with laryngomalacia had TM    | Retrospective study; different methods of confirmation of TM | Fluoroscopy and/or direct laryngoscopy and bronchoscopy under general anaesthesia                                                                                                                                         |
| <b>Boogaard 2005</b>                     | Tertiary referral centre; retrospective | All flexible bronchoscopies performed between 1997 and 2004 (n=512); malacia defined as collapse of at least 50% of the airway lumen, during expiration, cough or spontaneous breathing, or a ratio of cartilage to membranous wall area of < 3:1. | TM: 63 children; TBM: 49 children; BM: 24 children | 1 “to estimate the incidence of primary airway malacia in the general population”<br>2 “to estimate the predictive value of clinical diagnosis of malacia by paediatric pulmonologists”<br>3 “to characterise the presenting symptoms and findings in patients diagnosed with primary airway malacia” | Types of symptoms and clinical features      | Retrospective study                                          | Flexible bronchoscopy under general anaesthesia; airway malacia was diagnosed by visual inspection of airway shape and dynamics during spontaneous breathing without positive endexpiratory pressure, or during coughing. |
| <b>Carden 2005</b>                       | Review                                  | TM and TBM in children and adults                                                                                                                                                                                                                  | NA                                                 | “a comprehensive review of both the adult and paediatric forms of the disease” and “review of the various modalities that are used for diagnosis as well as the state                                                                                                                                 | Types of symptoms, severity, natural history | NA                                                           | NA                                                                                                                                                                                                                        |

|                      |                                               |                                                                                                    |                                                                                          |                                                                                                                                                                                                                     |                                                     |                                                                                                                                  |                                                |
|----------------------|-----------------------------------------------|----------------------------------------------------------------------------------------------------|------------------------------------------------------------------------------------------|---------------------------------------------------------------------------------------------------------------------------------------------------------------------------------------------------------------------|-----------------------------------------------------|----------------------------------------------------------------------------------------------------------------------------------|------------------------------------------------|
|                      |                                               |                                                                                                    |                                                                                          | of the art of treatment”                                                                                                                                                                                            |                                                     |                                                                                                                                  |                                                |
| <b>Choo 2013</b>     | Review                                        | Tracheomalacia/<br>Tracheobroncho-<br>malacia and<br>hyperdynamic<br>airway collapse               | NA                                                                                       | NA                                                                                                                                                                                                                  | Types of symptoms, severity,<br>natural history     | Adult literature                                                                                                                 | NA                                             |
| <b>Dessoffy 2013</b> | Retro-<br>spective                            | 236 children with<br>achondroplasia,<br>who were<br>initially assessed<br>between 1985 and<br>2012 | 9 children<br>with TM or<br>TBM                                                          | 1 “to establish the frequency<br>of airway malacia in a<br>cohort of children with<br>achondroplasia”<br>2 “to assess its interactions<br>with other known breathing<br>abnormalities in these<br>individuals”      | 4% of children with<br>achondroplasia had TM or TBM | Retrospective<br>study; different<br>methods of<br>confirmation of<br>TM or TBM                                                  | Airway endoscopy<br>or clinical<br>examination |
| <b>Doshi 2007</b>    | Case<br>report                                | NA                                                                                                 | NA                                                                                       | To describe symptoms of<br>TM in an infant                                                                                                                                                                          | Types of symptoms                                   | Case report                                                                                                                      | Bronchoscopy                                   |
| <b>Finder 1996</b>   | Retro-<br>spective                            | Patients with<br>primary BM                                                                        | 17 children<br>(age at<br>diagnosis of<br>BM: 3<br>months-17<br>years)                   | “to determine the natural<br>history of primary BM in<br>infants and children”                                                                                                                                      | Natural history                                     | Retrospective<br>study                                                                                                           | Bronchoscopy<br>under light<br>sedation?       |
| <b>Fraga 2016</b>    | Review                                        | Primary<br>(congenital) and<br>secondary<br>(acquired) TM<br>and TBM                               | NA                                                                                       | NA                                                                                                                                                                                                                  | Time of onset and types of<br>symptoms, severity    | NA                                                                                                                               | NA                                             |
| <b>Hiebert 2016</b>  | Systematic<br>review and<br>meta-<br>analysis | Articles<br>addressing<br>bronchoscopy in<br>children with<br>recurrent croup                      | 11 articles<br>reviewed;<br>5 articles<br>(455 patients)<br>included in<br>meta-analysis | 1. “to identify risk factors<br>that may predict clinically<br>significant findings on<br>bronchoscopy in children<br>with recurrent croup”<br>2. “to note the frequency of<br>bronchoscopy findings in<br>general” | TBM in 4.6% of children with<br>recurrent croup     | Heterogeneity<br>between studies<br>and lack of<br>specificity in<br>patient<br>reporting.<br>Selection bias of<br>the patients. | Bronchoscopy                                   |
| <b>Hysinger</b>      | Review                                        | Focus on TM                                                                                        | NA                                                                                       | 1. “to distinguish congenital                                                                                                                                                                                       | Types of symptoms, natural                          | NA                                                                                                                               | NA                                             |

|              |                                  |                                                                                                                                                                                                                                                              |                   |                                                                                                                                                                                                                                                                                                                                                                         |                                                                                      |                                       |                                                                                   |
|--------------|----------------------------------|--------------------------------------------------------------------------------------------------------------------------------------------------------------------------------------------------------------------------------------------------------------|-------------------|-------------------------------------------------------------------------------------------------------------------------------------------------------------------------------------------------------------------------------------------------------------------------------------------------------------------------------------------------------------------------|--------------------------------------------------------------------------------------|---------------------------------------|-----------------------------------------------------------------------------------|
| 2015         |                                  |                                                                                                                                                                                                                                                              |                   | TM from acquired TM”;<br>2. “to define respiratory mechanics that affect airway compliance”;<br>3. “to describe the formation and maturation of the paediatric central airway”;<br>4. “to describe advantages and disadvantages of the various methods of diagnosing paediatric TM”;<br>5. “to understand the current available treatment strategies for paediatric TM” | history, associated diseases                                                         |                                       |                                                                                   |
| Javia 2016   | Review                           | Congenital/primary and acquired/secondary TM                                                                                                                                                                                                                 | Neonates          | NA                                                                                                                                                                                                                                                                                                                                                                      | Types of symptoms and clinical features, associated conditions                       | NA                                    | NA                                                                                |
| Keng 2017    | Case report                      | NA                                                                                                                                                                                                                                                           | 83-year-old woman | NA                                                                                                                                                                                                                                                                                                                                                                      | Delayed onset of symptoms                                                            | Case report, adult patient            | NA                                                                                |
| Kompare 2012 | Retro-spective, specialty clinic | Incl: <60 months of age with cough, wheeze, and/or noisy breathing present for at least 1 month without other diagnoses for whom BAL cultures grew at least $10^4$ cfu/mL of a specific organism<br>Excl: asthma, CF, and other chronic diseases<br>TM or BM | 70 children       | “to examine associated findings and clinical outcome in young children with prolonged cough, wheeze, and/or noisy breathing in whom high colony counts of potentially pathogenic bacteria were cultured from bronchoalveolar lavage (BAL) during diagnostic flexible fiberoptic bronchoscopy”                                                                           | TM in 20%, BM in 43% and TBM in 11% of patients with protracted bacterial bronchitis | Retrospective study, no control group | Flexible bronchoscopy using topical lidocaine and intravenous procedural sedation |

|                     |                                               |                                                                                                                                                                                                                                                                                   |                                     |                                                                                                                                                                                                                                                               |                                                                |                                               |                                                                                      |
|---------------------|-----------------------------------------------|-----------------------------------------------------------------------------------------------------------------------------------------------------------------------------------------------------------------------------------------------------------------------------------|-------------------------------------|---------------------------------------------------------------------------------------------------------------------------------------------------------------------------------------------------------------------------------------------------------------|----------------------------------------------------------------|-----------------------------------------------|--------------------------------------------------------------------------------------|
|                     |                                               | diagnosed when segmental collapse such that the airway narrowed to a slit during expiration in the absence of suction through the bronchoscope's channel.                                                                                                                         |                                     |                                                                                                                                                                                                                                                               |                                                                |                                               |                                                                                      |
| <b>Kugler 2013</b>  | Review                                        | TM in children and adults                                                                                                                                                                                                                                                         | NA                                  | NA                                                                                                                                                                                                                                                            | Types of symptoms                                              | NA                                            | NA                                                                                   |
| <b>Maeda 2017</b>   | Review                                        | TM in children                                                                                                                                                                                                                                                                    | NA                                  | “to present the technical aspects of diagnosis and treatment of the most common paediatric airway disorders”                                                                                                                                                  | Types of symptoms                                              | NA                                            | NA                                                                                   |
| <b>Masters 2002</b> | Tertiary referral centre; observational study | Children with the endoscopic diagnosis of laryngomalacia, TM or TBM; TM defined as “a membranosa deformity in the trachea”<br>BM defined as “an appearance of deformity in the large right or left main-stem bronchi, and/or their respective divisions at the lobar or segmental | 299 children with malacia disorders | 1. “to describe an extensive experience of various forms of laryngomalacia, tracheomalacia, and bronchomalacia”<br>2. “to explore some of the interrelationships that exist between these conditions with respect to their anatomical sites and associations” | Types of symptoms and clinical features, associated conditions | No detailed description of symptoms and signs | Flexible bronchoscopy during spontaneous breathing under gaseous general anaesthesia |

|                                 |                                              |                                                                                                                                                                                                               |                                                                               |                                                                                                                                                            |                                                                                                                                                                                                                                                                          |                                                       |                                                                                      |
|---------------------------------|----------------------------------------------|---------------------------------------------------------------------------------------------------------------------------------------------------------------------------------------------------------------|-------------------------------------------------------------------------------|------------------------------------------------------------------------------------------------------------------------------------------------------------|--------------------------------------------------------------------------------------------------------------------------------------------------------------------------------------------------------------------------------------------------------------------------|-------------------------------------------------------|--------------------------------------------------------------------------------------|
|                                 |                                              | level.                                                                                                                                                                                                        |                                                                               |                                                                                                                                                            |                                                                                                                                                                                                                                                                          |                                                       |                                                                                      |
| <b>Masters 2008</b>             | Tertiary referral centre; case-control study | Children with chronic respiratory symptoms of cough, stridor, or wheeze present for >3 weeks that underwent bronchoscopy<br>Malacia defined as a deformity of the airway recorded at the end-expiratory point | Cases: 81 children (0.2-12.4 years)<br>Controls: 35 children (0.2-17.3 years) | “to prospectively examine the relationship between site and size of lesions with their respiratory symptoms and illness frequency”                         | Children with malacia have an increased likelihood of respiratory illness frequency, severity, significant cough, and tendency for delayed recovery. Neither the site nor the severity of malacia exhibited any significant dose effect on respiratory illness profiles. | Sample size                                           | Bronchoscopy with spontaneously breathing oxygen and sevoflurane general anaesthesia |
| <b>McNamara 2004</b>            | Review                                       | Primary and secondary TM                                                                                                                                                                                      | NA                                                                            | NA                                                                                                                                                         | Types of symptoms and clinical features, natural history                                                                                                                                                                                                                 | NA                                                    | NA                                                                                   |
| <b>Peh 2006</b>                 | Case report                                  | NA                                                                                                                                                                                                            | 4-week-old infant                                                             | NA                                                                                                                                                         | Delayed onset of symptoms                                                                                                                                                                                                                                                | Case report                                           | Bronchoscopy                                                                         |
| <b>Peters 2005</b>              | Case report and review                       | NA                                                                                                                                                                                                            | 20-month-old boy                                                              | “to discuss the differential diagnosis and clinical evaluation, and propose a new pathophysiological mechanism by which obstructive sleep apnea causes TM” | Types of symptoms and clinical features                                                                                                                                                                                                                                  | Case report                                           | Bronchoscopy                                                                         |
| <b>Rohde 2005</b>               | Case report                                  | NA                                                                                                                                                                                                            | 15-month-old boy                                                              | “to stress the importance of considering laryngo-tracheo-bronchomalacia as a cause of death in infancy and early childhood”                                | Types of symptoms                                                                                                                                                                                                                                                        | Case report                                           | Autopsy                                                                              |
| <b>Santiago-Burruchaga 2014</b> | Retrospective case-control                   | Incl: Children with recurrent pneumonia, chronic wet or                                                                                                                                                       | Cases: 62 children (12-144 months)<br>Controls: 29                            | 1. “to describe the bronchoscopic changes in children with recurrent lower airways infection”                                                              | Airway malacia in 52% of children with recurrent lower airway infection                                                                                                                                                                                                  | Retrospective study; control group not normal healthy | Bronchoscopy on spontaneous breathing under sedation-analgesia                       |

|  |               |                                                                                                                                                                                                                                                                                                                                                                                                                                                                                                                                                        |                         |                                                                                                                                                                       |  |          |                       |
|--|---------------|--------------------------------------------------------------------------------------------------------------------------------------------------------------------------------------------------------------------------------------------------------------------------------------------------------------------------------------------------------------------------------------------------------------------------------------------------------------------------------------------------------------------------------------------------------|-------------------------|-----------------------------------------------------------------------------------------------------------------------------------------------------------------------|--|----------|-----------------------|
|  | cohorts study | <p>productive cough, persistent atelectasis, or bronchiectasis</p> <p>Excl:<br/>Bronchopulmonary dysplasia, prematurity, difficult to control asthma, CF, immunodeficiency, genetic syndromes, neuromuscular, CNS or heart disease, airways or digestive tract malformations, severe scoliosis, protracted endotracheal intubation, tracheotomy or endobronchial aspiration syndrome</p> <p>Airway malacia considered to be present when &gt;50% dynamic collapse of the airways lumen during expiration on spontaneous breathing or during cough,</p> | children (5-168 months) | <p>2. “to investigate the prevalence of lower airway malacia”</p> <p>3. “to assess their prevalence in a control group without recurrent lower airways infection”</p> |  | children | and local anaesthesia |
|--|---------------|--------------------------------------------------------------------------------------------------------------------------------------------------------------------------------------------------------------------------------------------------------------------------------------------------------------------------------------------------------------------------------------------------------------------------------------------------------------------------------------------------------------------------------------------------------|-------------------------|-----------------------------------------------------------------------------------------------------------------------------------------------------------------------|--|----------|-----------------------|



|                        |                                         |                                                                                                                                                                                                                                                                                                                                                                  |                               |                                                                                                                                                                                                                                                                 |                                             |                     |                                                          |
|------------------------|-----------------------------------------|------------------------------------------------------------------------------------------------------------------------------------------------------------------------------------------------------------------------------------------------------------------------------------------------------------------------------------------------------------------|-------------------------------|-----------------------------------------------------------------------------------------------------------------------------------------------------------------------------------------------------------------------------------------------------------------|---------------------------------------------|---------------------|----------------------------------------------------------|
|                        |                                         | without suctioning                                                                                                                                                                                                                                                                                                                                               |                               |                                                                                                                                                                                                                                                                 |                                             |                     |                                                          |
| <b>Snijders 2015</b>   | Review                                  | Congenital and acquired TM                                                                                                                                                                                                                                                                                                                                       | NA                            | “to provide an update on diagnosis of TM in children”                                                                                                                                                                                                           | Types of symptoms and clinical features     | NA                  | NA                                                       |
| <b>Vicencio 2006</b>   | Short review                            | TM                                                                                                                                                                                                                                                                                                                                                               | NA                            | NA                                                                                                                                                                                                                                                              | Types of symptoms and clinical features     | NA                  | NA                                                       |
| <b>Weinberger 2007</b> | Review                                  | TM                                                                                                                                                                                                                                                                                                                                                               | NA                            | “to increase awareness of common and uncommon entities that have resulted in inappropriate diagnoses of asthma”                                                                                                                                                 | Causes of cough in children with TM         | NA                  | NA                                                       |
|                        |                                         |                                                                                                                                                                                                                                                                                                                                                                  |                               |                                                                                                                                                                                                                                                                 |                                             |                     |                                                          |
| <b>Yalcin 2005</b>     | Tertiary referral centre; retrospective | Incl: Patients with chronic respiratory symptoms who underwent bronchoscopy between February 1999 and November 2003. Excl: Asthma, cystic fibrosis<br>TM defined as an appearance of deformity and narrowing of the trachea’s cross-sectional area by, at least, more than 25% on expiration; BM defined as an appearance of deformity in the right or left main | 34 children with TM and/or BM | 1. “to review experience with flexible bronchoscopy for the assessment of TM and BM in children who presented with chronic respiratory problems”<br>2. “to evaluate their clinical and radiological characteristics and their association with other disorders” | Clinical presentation, associated disorders | Retrospective study | Bronchoscopy under mild sedation and topical anaesthesia |

|                     |                                         |                                                                                                                                                                                                                                                                                                                                                                                                              |              |                                                                                                                                                                                       |                                                                                                             |                                                                                                                             |                                            |
|---------------------|-----------------------------------------|--------------------------------------------------------------------------------------------------------------------------------------------------------------------------------------------------------------------------------------------------------------------------------------------------------------------------------------------------------------------------------------------------------------|--------------|---------------------------------------------------------------------------------------------------------------------------------------------------------------------------------------|-------------------------------------------------------------------------------------------------------------|-----------------------------------------------------------------------------------------------------------------------------|--------------------------------------------|
|                     |                                         | bronchi, and/or their divisions at the lobar and segmental levels, and narrowing of their cross-sectional areas by, at least, more than 25% on expiration                                                                                                                                                                                                                                                    |              |                                                                                                                                                                                       |                                                                                                             |                                                                                                                             |                                            |
| <b>Zgherea 2012</b> | Tertiary referral centre; retrospective | <p>Incl: Children with wet cough of more than 4 weeks' duration, unresponsive to therapy, referred for bronchoscopy</p> <p>Excl: Cystic fibrosis, primary ciliary dyskinesia, immunodeficiency syndromes, genetic syndromes, major airway abnormalities, muscle weakness, neurologic disorders, aspiration, asthma</p> <p>TM defined as collapse of at least 50% of the tracheal lumen during expiration</p> | 197 children | <p>1. "to determine the frequency of lower respiratory tract bacterial infections in children with wet cough"</p> <p>2. "to analyse the bronchoscopic findings in these children"</p> | 9 (14.1%) of children with purulent bronchitis and 6 (13.3%) of children with nonpurulent bronchitis had TM | Retrospective study; no reliable data on the prevalence of certain comorbidities; symptoms of children with TM not provided | Flexible bronchoscopy under light sedation |

NA, not applicable;

# LITERATURE REVIEW: QUESTION 4B

KQ 4b: In children with known TBM, what are the pulmonary function abnormalities?

| 1 <sup>st</sup> author, publication year | Setting; Study design | Inclusion criteria; Exclusion or definitions                                                                                                                   | Description of cohort                                                        | Main aim(s) of study                                                                                                                                                                                                                                                                                           | Primary findings relating to KQ                                                                                                                                                                                                                                                        | Main study limitation                                                  | Method of confirmation of TBM and type                                        |
|------------------------------------------|-----------------------|----------------------------------------------------------------------------------------------------------------------------------------------------------------|------------------------------------------------------------------------------|----------------------------------------------------------------------------------------------------------------------------------------------------------------------------------------------------------------------------------------------------------------------------------------------------------------|----------------------------------------------------------------------------------------------------------------------------------------------------------------------------------------------------------------------------------------------------------------------------------------|------------------------------------------------------------------------|-------------------------------------------------------------------------------|
| Abdel 2007                               | Retro-spective        | Incl: children with TM who had aortopexy<br>Excl: aortic arch anomalies; TM not defined                                                                        | N=20<br>mean age=29-mo (range 0.25, 11 years)                                | “Assess the efficacy of aortopexy in the long term, the clinical results and respiratory function...”                                                                                                                                                                                                          | Tidal expiratory flow values (TEF25%); median of cohort estimated at 66.5 %pred (range 15, 103)                                                                                                                                                                                        | Data was estimated from the graph provided. No other PFT data provided | Flexible bronchoscopy, spontaneous breathing                                  |
| Beardsmore 1994                          | Cohort                | Incl; children with esophageal atresia-tracheoesophageal fistula presenting to surgical service; TM not defined                                                | 16 children in cohort but only 3 had TM confirmed                            | 1. “Assess the relationship between clinical findings and respiratory function in infants following repairs of esophageal atresia-tracheoesophageal fistula;<br>2. Determine the value of respiratory function tests in elucidating mechanisms of respiratory disturbances and in predicting clinical outcome” | Increased (>2 z-score) total gas volume in 2 of the 3 children;<br>Increased total airway resistance in 2 of the 3 children                                                                                                                                                            | TM undefined                                                           | In one child, endoscopic confirmation mentioned; other 2 method not described |
| Boogaard 2005                            | Cross section         | TM=“collapse of at least 50% of the airway lumen, during expiration, cough or spontaneous breathing, or a ratio of cartilage to membranous wall area of < 3:1” | 45 of the 115 children with TM had PFT. Mean age of this group not described | 1. Estimate the incidence of primary TBM<br>2. Estimate the predictive value of a clinical diagnosis of TBM by pediatric pulmonologists 3. Characterize symptoms and findings in patients with primary TBM                                                                                                     | Mean % pred (SD)<br>FVC=99.3 (15.9)<br>FEV <sub>1</sub> =91.5 (19.9)<br>FEV <sub>1</sub> /FVC=87.7 (14.2)<br>PEF=74.7 (19.4)<br>MEF <sub>25</sub> =62.2 (31.3)<br>Pre and post broncho-dilation undertaken in 35, all values showed increased in mean values but no significant change | Proportion with FVC and FEV <sub>1</sub> abnormality not provided      | Flexible bronchoscopy; primary TM                                             |

|                          |                                |                                                                                                             |                                                                                               |                                                                                                                                                                                                    |                                                                                                                                                                                                                                                                                                                                                                                            |                                                                                                                          |                                                                                                                                        |
|--------------------------|--------------------------------|-------------------------------------------------------------------------------------------------------------|-----------------------------------------------------------------------------------------------|----------------------------------------------------------------------------------------------------------------------------------------------------------------------------------------------------|--------------------------------------------------------------------------------------------------------------------------------------------------------------------------------------------------------------------------------------------------------------------------------------------------------------------------------------------------------------------------------------------|--------------------------------------------------------------------------------------------------------------------------|----------------------------------------------------------------------------------------------------------------------------------------|
| <b>Davis<br/>1998</b>    | Cross<br>section               | TM=50% tracheal<br>narrowing at<br>bronchoscopy                                                             | 6 infants (3-<br>10 mo old)<br>with<br>moderate to<br>severe TM;<br>Controls: 2-<br>12 mo old | In children with TM, to<br>determine whether the<br>increase in V'max FRC with<br>CPAP could be explained by<br>the increase in FRC with<br>CPAP (0, 4, 8 cm H <sub>2</sub> O)                     | <u>Children with TM</u><br>Mean FVC=104%pred (SD 10)<br>Mean V'50=56%pred (SD 18)<br>Mean V'75=53%pred (SD 17)<br><u>Controls</u><br>Mean FVC=93%pred (SD 21)<br>Mean V'50=112%pred (28)<br>Mean V'75=108%pred (23)                                                                                                                                                                        |                                                                                                                          | Bronchoscopy<br>(type undefined)                                                                                                       |
| <b>Johnston<br/>1980</b> | Pre, post<br>Sx,<br>Case study | NA;<br>TM undefined                                                                                         | Child with R<br>ligamentum<br>arteriosum,<br>L aortic arch,<br>R descending<br>aorta          | To study animal model of<br>tracheomalacia and describe<br>2 children with symptomatic<br>TM                                                                                                       | After stenting- expiratory total<br>pulmonary resistance decreased<br>by 104%; inspiratory equivalent<br>changed by 1%<br>(PFT at ~18 mo)                                                                                                                                                                                                                                                  | 2 children but<br>only 1 with PFT<br>data. Child also<br>had VSD and<br>tracheostomy<br>decannulated<br>after TM stented | Bronchoscopy<br>(type unspecified);<br>vascular ring<br>divided at 3-mo<br>followed by<br>external rib stent<br>over TM at 12 mo       |
| <b>Moore<br/>2012</b>    | Cross<br>section               | Incl: Children<br>with TBM (21 of<br>66 invited<br>participated<br>Excl:<br>laryngomalacia;<br>TM undefined | 19 children;<br>median age<br>9.4 years<br>(range 7.6–<br>14.3)                               | To determine “whether<br>children with TBM have<br>persisting respiratory<br>symptoms and/or definable<br>abnormalities of lung<br>function on long-term<br>follow-up”                             | Mean %pred (95%CI), no<br>abnormal in cohort<br>FEV <sub>1</sub> =81% (72, 91), 7<br>FVC=96% (87, 105), 4<br>FEV <sub>1</sub> /FVC%=73 (67, 78), 13<br>FEF <sub>25-75</sub> =54% (43, 64), 15<br>PEF=60% (49, 70), 14<br>Classical TBM flow-volume<br>loop seen in 4 (22%)<br>Mannitol challenge negative in<br>13 of 15 (93%); 1 of 2 had<br>significant bronchodilator<br>responsiveness |                                                                                                                          | Flexible<br>bronchoscopy                                                                                                               |
| <b>Olbers<br/>2015</b>   | Cross<br>section               | Inclusion:<br>children born with<br>esophageal atresia<br>who have reached<br>aged 7 years;<br>TM undefined | Group of 13<br>of 26 children<br>who had TM                                                   | 1. Assess the prevalence of<br>respiratory morbidity in<br>children born with<br>esophageal atresia<br>2. Examine the cause this<br>morbidity using pulmonary<br>and esophageal function<br>tests. | Of those with known TM<br>(n=13), 3 had FEV <sub>1</sub> /FVC below<br>2 SD,<br>10 had FEV <sub>1</sub> /PEF ratio of >8                                                                                                                                                                                                                                                                   | Other PFTs in<br>TM group not<br>described and<br>TM undefined                                                           | Authors stated<br>“diagnosis of TM<br>requires X-ray<br>findings or<br>bronchoscopy”;<br>that was not<br>routinely but done<br>in many |

|                         |                |                                                                                                                            |                                                                       |                                                                                                                            |                                                                                                                                                      |                                                 |                                                                |
|-------------------------|----------------|----------------------------------------------------------------------------------------------------------------------------|-----------------------------------------------------------------------|----------------------------------------------------------------------------------------------------------------------------|------------------------------------------------------------------------------------------------------------------------------------------------------|-------------------------------------------------|----------------------------------------------------------------|
| <b>Panitch<br/>1990</b> | Case study     | 3 children in series but only 1 included as 2 had other concurrent significant lung disease and tracheostomy; TM undefined | Child with repaired laryngo-trachea-esophageal cleft repaired at 1-mo | To study pulmonary mechanics of 3 children with intrinsic TM after bronchoconstrictor and bronchodilator                   | Reduced (V'maxFRC) c.f. published norms; Methacholine improved V'maxFRC by 14.4%, Albuterol reduced V'maxFRC by 31.6%; saline did not alter VmaxFRC. | Changes described may not be specific to TM{57} | Rigid bronchoscopy                                             |
| <b>Shell<br/>2001</b>   | Case study     |                                                                                                                            | Child with TM related to innominate artery compression                |                                                                                                                            | Sx to rotate aorta anteriorly and to the left;<br>Pre Sx FEF25-75=28%, post=69%;<br>Pre Sx V'maxFRC=19%, post=57%;<br>Pre Sx FVC 114%, post 116%     |                                                 | Fluoroscopy followed by MRI                                    |
| <b>Uchida<br/>2009</b>  | Case series    | NA;<br>TM undefined                                                                                                        | 3 children with double aortic arch                                    | Description of 3 children mistreated as poorly controlled asthma whereby analysis of flow-volume curve suggested diagnosis | Flow-volume curves<br>#1: plateau of expiratory limb<br>#2: plateau of inspiratory and expiratory limbs<br>#3: plateau of expiratory limb            | TM undefined                                    | Chest CT with angiogram showing airway compression (undefined) |
| <b>Weber<br/>2002</b>   | Retro-spective | Children with life-threatening TM who had aortopexy; TM undefined                                                          | 8 of the 32 in cohort had PFT done (not specifically described)       | To report on children with life-threatening TM treated with aortopexy                                                      | FEV <sub>1</sub><br>pre-aortapexy=52% pred, SD 4%<br>post=82% ± 3%<br>post PFT undertaken 2 weeks to 3-mo post aortopexy                             |                                                 | Rigid or flexible bronchoscopy spontaneous breathing           |

CPAP= continuous positive airway pressure; Excl=exclusion; Incl=inclusion; mo=months; NA=not applicable; PFT=pulmonary function test; pred=predicted; Sx=Surgery; TBM=trachea-broncho-malacia; TM=tracheomalacia; V'maxFRC=maximal flow at functional residual capacity

### **Summary of data**

- Lung function cannot be used to diagnose TBM but provides supportive diagnosis
- Sensitivity and specificity of any PFT cannot be determined
- Although many studies show some have a degree of expiratory airway obstruction; not all have.
- Obstruction pattern defined by reduction in FEV1, V'max FRC, PEF, MEF, TEF, airway resistance, abnormality in flow-volume loops
- FVC not affected or may be elevated, TGV elevated
- AHR present in some children

### **Limitation of data**

- Need PFT related to TBM severity;
- Limited studies- many small number; only 2 cohorts

### LITERATURE REVIEW ON QUESTION 5 - RADIOLOGY

How do we use imaging to diagnose TM & BM? [to include tracheobronchography]

| 1 <sup>st</sup> author, publication year | Setting; study design | Inclusion criteria; exclusion or definition                                                                                                                                     | Description of cohort                                                                                                                | Main aim(s) of study                                                                                                            | Primary findings relating to KQ                                                                                                                                      | Main study limitation                                                                                                                                      | Method of confirmation of TBM and type |
|------------------------------------------|-----------------------|---------------------------------------------------------------------------------------------------------------------------------------------------------------------------------|--------------------------------------------------------------------------------------------------------------------------------------|---------------------------------------------------------------------------------------------------------------------------------|----------------------------------------------------------------------------------------------------------------------------------------------------------------------|------------------------------------------------------------------------------------------------------------------------------------------------------------|----------------------------------------|
| Austin J, 2003                           | Review                | Do not describe papers search                                                                                                                                                   |                                                                                                                                      |                                                                                                                                 |                                                                                                                                                                      |                                                                                                                                                            |                                        |
| Berrocal T, 2004                         | Review                | Do not describe papers search                                                                                                                                                   |                                                                                                                                      |                                                                                                                                 |                                                                                                                                                                      |                                                                                                                                                            |                                        |
| Fraga JC, 2016                           | Review                | Do not describe papers search                                                                                                                                                   |                                                                                                                                      |                                                                                                                                 |                                                                                                                                                                      |                                                                                                                                                            |                                        |
| Sanchez MO, 2012                         | Prospective study     | Children with a suspected airway abnormality and with clinical symptoms including stridor, chronic cough, recurrent pneumonia, persistent pulmonary infiltrates or atelectasis. | 22 children underwent fluoroscopy and Flexible Bronchoscopy (FB). TM was found in 21 children by FB.                                 | To study sensitivity, specificity and predictive ratios of airway fluoroscopy compared with FB.                                 | Fluoroscopy detected TM in 5/21 children. Airway fluoroscopy was poorly sensitive (23.8%) but highly specific (100%) and positive likelihood ratio was 8.6           | Small cohort of children                                                                                                                                   | Flexible Bronchoscopy                  |
| Berg E, 2008                             | Retrospective study   | Children with stridor who underwent both endoscopy and fluoroscopy within a 5y time period.                                                                                     | 39 children, endoscopic findings: 13 with airway stenosis, 11 with laryngomalacia, 7 with airway mass lesion, 5 with tracheomalacia. | To determine the sensitivity and specificity of airway fluoroscopy in the diagnosis of pediatric laryngotracheal abnormalities. | The sensitivity of fluoroscopy in the diagnosis of laryngomalacia, TM, airway stenosis, and an airway mass was 27%, 20%, 69%, and 43%, respectively. The specificity | Small cohort of children. The sample sizes within each diagnostic subgroup were even smaller (eg, there were only 5 patients in the tracheomalacia group). | Endoscopy                              |

|                     |                                                                                 |                                                                                                                        |                                                                                                               |                                                                                                                                                           |                                                                                                                                                                                                         |                                                                             |                                                        |
|---------------------|---------------------------------------------------------------------------------|------------------------------------------------------------------------------------------------------------------------|---------------------------------------------------------------------------------------------------------------|-----------------------------------------------------------------------------------------------------------------------------------------------------------|---------------------------------------------------------------------------------------------------------------------------------------------------------------------------------------------------------|-----------------------------------------------------------------------------|--------------------------------------------------------|
|                     |                                                                                 |                                                                                                                        |                                                                                                               |                                                                                                                                                           | for the same diagnoses was 100%, 94%, 100%, and 100%, respectively. Airway fluoroscopy appeared to have low sensitivity but high specificity in detecting airway abnormalities.                         |                                                                             |                                                        |
| <b>Lee EY, 2008</b> | Case series (Retrospective review and analysis of radiologic and clinical data) | Infants with mediastinal aortic vascular anomalies referred for paired inspiratory-expiratory MDCT.                    | 5 symptomatic infants underwent paired inspiratory – expiratory MDCT, while 4 underwent bronchoscopy as well. | To assess the feasibility of paired inspiratory – expiratory MDCT for evaluating TM among symptomatic infants with mediastinal aortic vascular anomalies. | TM was confirmed in 3 out of 5 infants at the level of mediastinal aortic vascular anomaly. The CT results were concordant with the results of bronchoscopy in all patients who underwent bronchoscopy. | Limited cohort                                                              | Bronchoscopy                                           |
| <b>Lee EY, 2008</b> | Retrospective study                                                             | Pediatric patients with respiratory symptoms who underwent paired inspiratory- expiratory MDCT and were diagnosed with | 15 children, underwent paired inspiratory-expiratory MDCT, while 9                                            | To determine the prevalence of TM associated with different types of mediastinal                                                                          | 8 of 15 patients diagnosed with TM, results concordant with Bronchoscopy. Symptomatic                                                                                                                   | 1. Small cohort.<br>2. Not equal number of cases from each type of vascular | Bronchoscopy and/or paired inspiratory-expiratory MDCT |



|                          |                     |                                                                                                                  |                                                           |                                                                                                                                                                                      |                                                                                                                                                                                                                   |                                                                                                              |                                                         |
|--------------------------|---------------------|------------------------------------------------------------------------------------------------------------------|-----------------------------------------------------------|--------------------------------------------------------------------------------------------------------------------------------------------------------------------------------------|-------------------------------------------------------------------------------------------------------------------------------------------------------------------------------------------------------------------|--------------------------------------------------------------------------------------------------------------|---------------------------------------------------------|
|                          |                     | mediastinal aortic vascular anomalies.                                                                           | underwent bronchoscopy as well.                           | aortic vascular anomalies in symptomatic children using paired inspiratory-expiratory MDCT.                                                                                          | pediatric patients with mediastinal aortic vascular anomalies have a relatively high prevalence of TM. Paired inspiratory-expiratory MDCT should be considered part of the routine preoperative evaluation of TM. | 3. Retrospective study.                                                                                      |                                                         |
| <b>Ngerncham M, 2015</b> | Retrospective study | Infants who had esophageal atresia (EA) and underwent MDCT as preoperative evaluation of TBM prior to aortopexy. | 18 patients underwent paired inspiratory-expiratory MDCT. | To compare paired inspiratory-expiratory MDCT with intraoperative Diagnostic Laryngoscopy and Bronchoscopy (DLB) in the assessment of TBM in symptomatic pediatric patients with EA. | Overall diagnostic accuracy of dynamic airway MDCT compared to DLB was 91%. MDCT is highly accurate and reliable non-invasive modality for evaluating TBM.                                                        | 1. Small population size.<br>2. Retrospective nature of study.<br>3. No normal control group to be compared. | Intraoperative Diagnostic Laryngoscopy and Bronchoscopy |
| <b>Lee EY, 2009</b>      | Review              | Do not describe papers search                                                                                    |                                                           |                                                                                                                                                                                      |                                                                                                                                                                                                                   |                                                                                                              |                                                         |
| <b>Long FR,</b>          | Retrospective       | Pediatric patients,                                                                                              | 87 children                                               | To describe the                                                                                                                                                                      | Full inflation                                                                                                                                                                                                    | 1. Retrospective                                                                                             | Controlled-ventilation                                  |

|                     |                     |                                                                                                                                                                |                                                                                                              |                                                                                                                                                                                                      |                                                                                                                                                                                                                                                        |                                                                                                                                                                                                                                                                                           |              |
|---------------------|---------------------|----------------------------------------------------------------------------------------------------------------------------------------------------------------|--------------------------------------------------------------------------------------------------------------|------------------------------------------------------------------------------------------------------------------------------------------------------------------------------------------------------|--------------------------------------------------------------------------------------------------------------------------------------------------------------------------------------------------------------------------------------------------------|-------------------------------------------------------------------------------------------------------------------------------------------------------------------------------------------------------------------------------------------------------------------------------------------|--------------|
| <b>2001</b>         | study               | who underwent conscious sedation and controlled-ventilation CT (CVCT) of the chest over a 2-year period, because they could not cooperate with breath holding. | underwent conscious sedation and CVCT of the chest.                                                          | technique and utility of a non-invasive method called controlled-ventilation CT (CVCT) for obtaining motion-free full-inflation and end-exhalation images of the lung in infants and young children. | CVCT was useful in evaluating tracheal and bronchial stenosis, bronchial wall thickening, early bronchiectasis, bronchial fistula, extend of interstitial fibrosis and lung nodules. End exhalation CVCT was useful in evaluating TM and air trapping. | <ol style="list-style-type: none"> <li>study, which did not compare prospectively the CVCT with the quiet breathing technique.</li> <li>CVCT requires the use of sedation.</li> </ol>                                                                                                     | CT           |
| <b>Goo HW, 2013</b> | Retrospective study | Pediatric patients with TM who underwent free-breathing cine-CT.                                                                                               | 27 children with bronchoscopic evidence of TM, and a control group (n=320) underwent free breathing cine-CT. | To investigate the accuracy of free breathing cine-CT for diagnosis of TM in young children with bronchoscopy as reference standard.                                                                 | If a cross sectional area change of the trachea of 31.6% was used as a cut-off value for the diagnosis of TM the sensitivity, specificity and accuracy of cine-CT were 96.3% (26/27), 97.2% (311/320) and 97.1% (337/347), respectively.               | <ol style="list-style-type: none"> <li>Bronchoscopy not performed in controls.</li> <li>Only a few slices of the entire trachea were evaluated.</li> <li>A reproducibility study of the measurements was not performed.</li> <li>Sedation might influence tracheal collapse on</li> </ol> | Bronchoscopy |

|                           |                                   |                                                                                                                                                               |                                                                                                                                                                               |                                                                                                                                                                              |                                                                                                                                           |                                                                                                                             |                                 |
|---------------------------|-----------------------------------|---------------------------------------------------------------------------------------------------------------------------------------------------------------|-------------------------------------------------------------------------------------------------------------------------------------------------------------------------------|------------------------------------------------------------------------------------------------------------------------------------------------------------------------------|-------------------------------------------------------------------------------------------------------------------------------------------|-----------------------------------------------------------------------------------------------------------------------------|---------------------------------|
|                           |                                   |                                                                                                                                                               |                                                                                                                                                                               |                                                                                                                                                                              | Free-breathing cine-CT has potential to provide the diagnosis of TM in young children.                                                    | cine-CT.                                                                                                                    |                                 |
| <b>Tan JZ, 2013</b>       | Case series (Retrospective study) | Pediatric patients with complex clinical respiratory presentation who were referred for dynamic assessment of their airways, at a tertiary paediatric centre. | 8 infants: 4 with TM, 4 without tracheobronchial abnormalities (proved with bronchoscopy or bronchography). All underwent dynamic volumetric CT (four-dimensional technique). | To evaluate the dynamic volumetric CT (four-dimensional technique) in the assessment of the paediatric airway.                                                               | Volumetric CT enables four-dimensional assessment for paediatric TBM without intubation or patient cooperation and at low radiation dose. | Retrospective study with a small sample group.                                                                              | Bronchoscopy or Bronchography   |
| <b>Greenberg SB, 2014</b> | Retrospective study               | Infants with congenital heart disease who underwent Dynamic Pulmonary CTA (DP-CTA) for evaluation of unexplained persistent respiratory distress.             | 23 infants with congenital heart disease and persistent respiratory distress: 17 with TBM proved by DP-CTA (cine-CT).                                                         | To evaluate the efficacy of DP-CTA to provide unique information for patient care in newborns and infants with congenital heart disease and persistent respiratory distress. | DP-CTA is uniquely suited for comprehensive and simultaneous evaluation of airway and vascular abnormalities in infants.                  | 1. Small cohort.<br>2. Comparative bronchoscopies not performed in enough patients.<br>3. No long term follow up available. | Dynamic Pulmonary CTA (Cine-CT) |
| <b>Lee S, 2014</b>        | Retrospective study               | Infants who underwent both chest CT and bronchoscopy within 1 week.                                                                                           | 17 infants who underwent both bronchoscopy and 3D-CT-bronchoscopy:                                                                                                            | To evaluate the use of a non-breath held 3D-CT bronchoscopy                                                                                                                  | In 10 children TM was confirmed. Sensitivity was <75% in                                                                                  | 1. 11/17 bronchoscopies were performed after CT and                                                                         | Flexible Bronchoscopy           |

|                    |                   |                                                                                       |                                                                               |                                                                                                                                              |                                                                                                                                                                                                                                        |                                                                                                                                                                                                                                                                         |                       |
|--------------------|-------------------|---------------------------------------------------------------------------------------|-------------------------------------------------------------------------------|----------------------------------------------------------------------------------------------------------------------------------------------|----------------------------------------------------------------------------------------------------------------------------------------------------------------------------------------------------------------------------------------|-------------------------------------------------------------------------------------------------------------------------------------------------------------------------------------------------------------------------------------------------------------------------|-----------------------|
|                    |                   |                                                                                       |                                                                               | in detecting TBM in infants.                                                                                                                 | detecting laryngomalacia, TM and BM. Specificity and PPV was 100% in layngomalacia and TM.                                                                                                                                             | <p>the pulmonologist was not blinded.</p> <p>2. Diffuse airway narrowing is difficult to detect in the VR images.</p> <p>3. A selection bias may have occurred from excluding the patients with severe artifacts in the CT scan.</p> <p>4. Small cohort of infants.</p> |                       |
| <b>Su SC, 2017</b> | Prospective study | Children aged<18 years scheduled for having both FB (Flexible Bronchoscopy) and MDCT. | 53 children evaluated for airway abnormalities: TM was confirmed in 37 at FB. | A Comparison of Virtual Bronchoscopy (VB) versus FB in the Diagnosis of TBM in Children. To determine sensitivity, specificity, PPV and NPV. | VB detected TM in 20patients. Sensitivity of 54.1% (95%CI 37.1–70.2), Specificity 87.5% (95%CI 60.4–97.8), and positive predictive value 90.9% (95%CI 69.4-98.4). VB cannot replace FB as gold standard for detecting TBM in children. | <p>1. Preselection of patients with a diagnosis of TBM.</p> <p>2. Duration of anesthesia was longer by the time FB occurred.</p> <p>3. 7 children who underwent MDCT without sedation received gaseous anesthesia for FB.</p>                                           | Flexible Bronchoscopy |

|                         |                                                                                                 |                                                                                                                                                                                 |                                                                                                                                                                                   |                                                                                                                                                                           |                                                                                                                                                                                                                                                     |                                                                                                                                                            |                           |
|-------------------------|-------------------------------------------------------------------------------------------------|---------------------------------------------------------------------------------------------------------------------------------------------------------------------------------|-----------------------------------------------------------------------------------------------------------------------------------------------------------------------------------|---------------------------------------------------------------------------------------------------------------------------------------------------------------------------|-----------------------------------------------------------------------------------------------------------------------------------------------------------------------------------------------------------------------------------------------------|------------------------------------------------------------------------------------------------------------------------------------------------------------|---------------------------|
|                         |                                                                                                 |                                                                                                                                                                                 |                                                                                                                                                                                   |                                                                                                                                                                           |                                                                                                                                                                                                                                                     | 4. Inability to standardized lung volumes and airway pressure during FB and VB.                                                                            |                           |
| <b>Deacon JWF, 2017</b> | Retrospective study (Data were collected retrospectively by reviewing the medical record files) | Pediatric patients with TM, confirmed by rigid laryngobronchoscopy, over a 3,5-year period.                                                                                     | 71 pediatric patients with TM: 28 had chest CTA.                                                                                                                                  | To describe the clinical presentation of children with TM and to analyse the benefits to patient management of investigations used in the diagnosis and imaging of TM.    | Rate of TM detection on CTA is 42,9%                                                                                                                                                                                                                | Hospital records reviewed was variable and sometimes incomplete.                                                                                           | Rigid laryngobronchoscopy |
| <b>Lee EY, 2010</b>     | Retrospective study (Retrospectively and randomly identify pediatric patients)                  | All pediatric patients who underwent paired inspiratory and expiratory MDCT studies for the evaluation of clinically suspected TM, on the basis of clinical signs and symptoms. | 20 standard-dose and 20 reduced-expiratory dose, paired inspiratory-expiratory MDCT studies performed for the evaluation of suspected TM in paediatric patients (aged <18 years). | To assess the effects of radiation dose reduction on the assessment of the tracheal lumen on expiratory MDCT images of pediatric patients referred for evaluation for TM. | TM was diagnosed by CT in 7 patients who underwent standard-dose and 6 patients who underwent reduced-dose paired inspiratory-expiratory MDCT studies. CT results were concordant with the results of bronchoscopy in all 32 patients who underwent | 1. Retrospective study.<br>2. Subjective grading of the confidence level in measuring the tracheal lumen.<br>3. Different machines used in the population. | Bronchoscopy              |

|                       |                               |                                                                                                           |                                                                                                                            |                                                                                                                                                              |                                                                                                                                                                                                                   |                           |              |
|-----------------------|-------------------------------|-----------------------------------------------------------------------------------------------------------|----------------------------------------------------------------------------------------------------------------------------|--------------------------------------------------------------------------------------------------------------------------------------------------------------|-------------------------------------------------------------------------------------------------------------------------------------------------------------------------------------------------------------------|---------------------------|--------------|
|                       |                               |                                                                                                           |                                                                                                                            |                                                                                                                                                              | both procedures. The radiation dose can be reduced by 23% while maintaining similar diagnostic confidence for assessment of the tracheal lumen compared to a standard-dose technique in pediatric patients.       |                           |              |
| <b>Javia L, 2016</b>  | Review                        | Do not describe papers search.                                                                            |                                                                                                                            |                                                                                                                                                              |                                                                                                                                                                                                                   |                           |              |
| <b>Faust RA, 2001</b> | Prospective, controlled study | Pediatric and adult patients, with respiratory symptoms scheduled for having both Endoscopy and cine-MRI. | A cohort of 10 pediatric patients, 10 adult patients, and 10 normal volunteers: underwent static MRI, as well as cine-MRI. | To investigate the feasibility of using cine-MRI techniques to dynamically image the human airway and to assess laryngeal and tracheal patency and function. | The imaging findings correlated with patient's endoscopy. TM was depicted in 8 pediatric patients. Airway cine-MRI has the potential to provide novel data regarding laryngeal and tracheal patency and function. | Small cohort of children. | Endoscopy    |
| <b>Faust RA,</b>      | Case series                   | Pediatric and adult                                                                                       | 2 pediatric + 1                                                                                                            | To apply cine-                                                                                                                                               | Both techniques                                                                                                                                                                                                   | Very limited              | Bronchoscopy |

|                     |                                                    |                                                                            |                                                          |                                                                                                                              |                                                                                                                                                                                                                                                                                      |                                               |                                   |
|---------------------|----------------------------------------------------|----------------------------------------------------------------------------|----------------------------------------------------------|------------------------------------------------------------------------------------------------------------------------------|--------------------------------------------------------------------------------------------------------------------------------------------------------------------------------------------------------------------------------------------------------------------------------------|-----------------------------------------------|-----------------------------------|
| <b>2002</b>         |                                                    | patients in respiratory distress underwent both bronchoscopy and cine-MRI. | adult patients underwent both bronchoscopy and cine-MRI. | MRI to evaluate patients with respiratory distress who exhibited tracheal compression at the level of the innominate artery. | confirmed TM in all cases, mainly at the level of the innominate artery. Cine-MRI provides extremely rapid acquisition for functional imaging of tracheal patency during the respiratory cycle, while it may provide additional insight into innominate artery compression syndrome. | cohort.                                       |                                   |
| <b>Ciet P, 2014</b> | Retrospective study (Retrospective image analysis) | Children suspected of having TBM underwent cine-MRI.                       | 12 children underwent cine-MRI: TBM was diagnosed in 7.  | To evaluate the feasibility of spirometer-controlled cine-MRI as an alternative to cine-CT.                                  | TBM was diagnosed in 7, confirmed with bronchoscopy or chest CT. Spirometer controlled cine-MRI is a promising technique to assess TBM in children and has the potential to replace                                                                                                  | 1. Retrospective study.<br>2. Limited cohort. | Flexible Bronchoscopy or chest CT |

|                        |                                                            |                                                                                                                         |                                                                                           |                                                                                                                                                      |                                                                                                                                                                                                                                                                                                             |                                                                        |              |
|------------------------|------------------------------------------------------------|-------------------------------------------------------------------------------------------------------------------------|-------------------------------------------------------------------------------------------|------------------------------------------------------------------------------------------------------------------------------------------------------|-------------------------------------------------------------------------------------------------------------------------------------------------------------------------------------------------------------------------------------------------------------------------------------------------------------|------------------------------------------------------------------------|--------------|
| <b>Rimell FL, 1997</b> |                                                            |                                                                                                                         |                                                                                           |                                                                                                                                                      | bronchoscopy.                                                                                                                                                                                                                                                                                               |                                                                        |              |
|                        | Retrospective study<br>(Study was based on a chart review) | Children with various distal airway disorders over a 3-year period, who underwent MRI for the evaluation of the airway. | 49 children: 45 underwent both endoscopy and MRI, while 14 underwent fluoroscopy as well. | To determine the role of MRI and how it relates to endoscopy as well as to other imaging modalities in the evaluation of pediatric airway disorders. | Discrepancies between MRI and endoscopy noted in 7, while 2 false negative results noted in fluoroscopy. Magnetic resonance imaging was the most accurate modality in defining extrinsic airway abnormalities. Fluoroscopy combined with barium swallow plays an important role as a screening examination. | 1. Retrospective study.<br>2. No detailed description of TBM patients. | Bronchoscopy |



### QUESTION 6: LITERATURE REVIEW BRONCHOSCOPY

The role of bronchoscopy to diagnose and grade TB and TB

| 1 <sup>st</sup> author, publication year | Setting; Study design              | Inclusion criteria; Exclusion or definitions                                                                                                                                   | Description of cohort                                                                                                                              | Main aim(s) of study                                                                                            | Primary findings relating to KQ                                                                                                                                                      | Main study limitation                                                                                                                                                                  | Method of confirmation of TBM and type |
|------------------------------------------|------------------------------------|--------------------------------------------------------------------------------------------------------------------------------------------------------------------------------|----------------------------------------------------------------------------------------------------------------------------------------------------|-----------------------------------------------------------------------------------------------------------------|--------------------------------------------------------------------------------------------------------------------------------------------------------------------------------------|----------------------------------------------------------------------------------------------------------------------------------------------------------------------------------------|----------------------------------------|
| Lee 2007                                 | Case series                        | Children with MAVA referred for paired inspiratory-expiratory MDCT                                                                                                             | N=5<br>mean age 4.1-mo (range 2 weeks – 6 months)                                                                                                  | To assess technical feasibility of paired inspiratory-expiratory MDCT for evaluating TM among infants with MAVA | In patients who underwent bronchoscopy there was concordance between bronchoscopic findings and MDCT findings                                                                        | 1. Small number of patients<br>2. The technique require cooperation                                                                                                                    | FB, spontaneous breathing              |
| Sanchez 2012                             | Case series                        | Children with a suspected airway abnormality and with clinical symptoms including stridor, chronic cough, recurrent pneumonia, persistent pulmonary infiltrates or atelectasis | 22 children median age 33 months range 1-187.<br>(4 with inspiratory, 2 expiratory and 8 biphasic stridor, 13 chronic wheeze, 8 cyanotic episodes) | To study sensitivity, specificity and predictive ratios of airway fluoroscopy compared with FB                  | TM was found in 21 children, fluoroscopy detected TM in 5 children. Airway fluoroscopy was poorly sensitive (23.8%) but highly specific (100%) and positive likelihood ratio was 8.6 | Small cohort of children                                                                                                                                                               | FB                                     |
| Lee 2013                                 | Case series<br>Retrospective study | Infants under 12 months old who underwent both chest CT and bronchoscopy within 1 week                                                                                         | 17 patients mean age 2 months, range 1-11 months.                                                                                                  | To evaluate the use of a non-breath held 3D-CT-bronchoscopy to detecting TM in infants                          | In 10 children TM was confirmed. Sensitivity was <75% in detecting laryngomalacia, TM and BM. Specificity and PPV was 100% in                                                        | 1. 17 bronchoscopies were performed after CT and the pulmonologist was not blinded.<br>2. Diffuse airway narrowing is difficult to detect in the VR images.<br>3. A selection bias may | FB                                     |

|               |             |                                                                                                           |                                                         |                                                                                          |                                                                     |                                                                                                                                                                                                                                                                                               |    |
|---------------|-------------|-----------------------------------------------------------------------------------------------------------|---------------------------------------------------------|------------------------------------------------------------------------------------------|---------------------------------------------------------------------|-----------------------------------------------------------------------------------------------------------------------------------------------------------------------------------------------------------------------------------------------------------------------------------------------|----|
|               |             |                                                                                                           |                                                         |                                                                                          | layngomalacia and TM                                                | have occurred from excluding the patients with severe artifacts in the CT scan                                                                                                                                                                                                                |    |
| Su 2016       | Case series | Children aged <18 years scheduled for having both FB and MCDT, undertaken 30-min to 7-days of each other. | 56 children median age 2.5 years, range 0.8-14.3 years. | To determine sensitivity, specificity, PPV and NPV of VB compared to FB in diagnosis TBM | VB cannot replace FB as gold standard for detecting TBM in children | 1.Preselection of patients with a diagnosis of TBM<br>2. Duration of anesthesia was longer by the time FB occurred.<br>3. 7 children who underwent MDCT without sedation received gaseous anesthesia for FB<br>4. Inability to standardized lung volumes and airway pressure during FB and VB | FB |
| Carden 2005   | Review      | Do not describe papers search                                                                             |                                                         |                                                                                          |                                                                     |                                                                                                                                                                                                                                                                                               |    |
| Snijders 2015 | Review      | Do not describe papers search                                                                             |                                                         |                                                                                          |                                                                     |                                                                                                                                                                                                                                                                                               |    |
| Kugler 2014   | Review      | Do not describe papers search                                                                             |                                                         |                                                                                          |                                                                     |                                                                                                                                                                                                                                                                                               |    |
| Masters 2009  | Review      | Do not describe papers search                                                                             |                                                         |                                                                                          |                                                                     |                                                                                                                                                                                                                                                                                               |    |
| Wright 2003   | Review      | Do not describe papers search                                                                             |                                                         |                                                                                          |                                                                     |                                                                                                                                                                                                                                                                                               |    |
| Austin 2003   | Review      | Do not describe papers search                                                                             |                                                         |                                                                                          |                                                                     |                                                                                                                                                                                                                                                                                               |    |
| Fraga 2016    | Review      | Do not describe papers search                                                                             |                                                         |                                                                                          |                                                                     |                                                                                                                                                                                                                                                                                               |    |
| Yie Tan 2011  | Review      | Do not describe papers search                                                                             |                                                         |                                                                                          |                                                                     |                                                                                                                                                                                                                                                                                               |    |

|                 |                                       |                                                                                       |                                                                                                                          |                                                                                                                                                                                                                |                                                                                                                                                                                                                                                                                                                                                |                                                                                                                                                                                                                                                                             |                                                                                                                                                             |
|-----------------|---------------------------------------|---------------------------------------------------------------------------------------|--------------------------------------------------------------------------------------------------------------------------|----------------------------------------------------------------------------------------------------------------------------------------------------------------------------------------------------------------|------------------------------------------------------------------------------------------------------------------------------------------------------------------------------------------------------------------------------------------------------------------------------------------------------------------------------------------------|-----------------------------------------------------------------------------------------------------------------------------------------------------------------------------------------------------------------------------------------------------------------------------|-------------------------------------------------------------------------------------------------------------------------------------------------------------|
| Nemes<br>2014   | Review                                | Do not describe papers search                                                         |                                                                                                                          |                                                                                                                                                                                                                |                                                                                                                                                                                                                                                                                                                                                |                                                                                                                                                                                                                                                                             |                                                                                                                                                             |
| Masters<br>2008 | Prospective case control study        | Children with CRS of cough, stridor or wheeze present for > 3 weeks who underwent FB. | Patients: 116 children (77 male), 81 with TM, median age 2.1 years, range 0.2 -17.3 years. Controls: 31 healthy children | Prospectively examine relationship between TM lesions and their respiratory illness profile                                                                                                                    | The RR of illness frequency was 2.1 (95% CI 1.3 to 3.4) and of significant cough 7.2 (95% CI 1.01 to 27.22) for the malacia group while the CARIFS day 1 score was 1.66 (95% CI, 1.1 to 2.56) compared to control subjects. Malacia type and severity of lesions were not associated with increased rates of illness or worse clinical profile | <ol style="list-style-type: none"> <li>1. The tools for the bronchoscopic measurement.</li> <li>2. Clinical illness outcome scales.</li> <li>3. Sample size</li> </ol>                                                                                                      | FB under sevoflurane general anesthesia. End expiratory airway images were recorded 10 mm from the object and were measured using histogram mode technique. |
| Majid<br>2014   | Prospective observational pilot study | Adult patients with suspected TM                                                      | 10 adult patients (median age 65 years, 6 female) with suspected TM                                                      | To test inter and intra observer agreement (23 pulmonologist) of dynamic FB data estimating the degree of TB collapse obtained at five different sites during exhalation or excessive dynamic airway collapse. | Inter and intra observer correlation coefficients were: PT 0.85 (0.002) and 0.92 (<0.001); MT 0.68 (0.03) and 0.82 (0.004); DT 0.89 (<0.001) and 0.95 (<0.001); RMSB 0.72 (0.02) and 0.8 (0.02); LMSB 0.92 (<0.001) and 0.96 (<0.001).                                                                                                         | <ol style="list-style-type: none"> <li>1. Video images that are susceptible to distortions</li> <li>2. Lumen size was estimated by antero-posterior diameter and not quantitatively measured by cross-sectional area.</li> <li>3. Small number of adult patients</li> </ol> | Dynamic FB                                                                                                                                                  |
| Asai<br>2001    | Case report                           | A child who presented airway                                                          | A 22 month old child with an                                                                                             | Description of a case of airway obstruction with                                                                                                                                                               | Obstruction due to TBM during                                                                                                                                                                                                                                                                                                                  | One case                                                                                                                                                                                                                                                                    | FB                                                                                                                                                          |

|                          |             |                                                                                                                                                          |                                                                                                                        |                                                                                                                                                                                                                            |                                                                                                                     |                                                                                    |     |
|--------------------------|-------------|----------------------------------------------------------------------------------------------------------------------------------------------------------|------------------------------------------------------------------------------------------------------------------------|----------------------------------------------------------------------------------------------------------------------------------------------------------------------------------------------------------------------------|---------------------------------------------------------------------------------------------------------------------|------------------------------------------------------------------------------------|-----|
|                          |             | obstruction due to TM during emergence from anesthesia.                                                                                                  | erythematous lesion on the right arm scheduled for resection of the cutaneous lesion under anesthesia with sevoflurane | hypoxia during emergence from anesthesia due to unexpected TBM                                                                                                                                                             | emergence from anesthesia                                                                                           |                                                                                    |     |
| <b>Oh<br/>2002</b>       | Case report | A child who presented unexpected TM after beginning of the operation                                                                                     | A 12 yr old boy with MS who was scheduled for a spine fusion operation because of scoliosis under general anesthesia   | Description of a case of TM in a child with MS who undergo surgery for scoliosis                                                                                                                                           | Obstruction due to TM after beginning operation                                                                     | 1. One case<br>2. No description of general anesthesia                             | FB  |
| <b>Okuda<br/>2000</b>    | Case report | A child who presented airway obstruction during induction and after anesthesia                                                                           | A 1 yr old girl with suspected congenital TM scheduled for FB under GA with secifluorane                               | Description of a case of TM who undergo FB for a suspected congenital TM                                                                                                                                                   | Obstruction during induction and after GA                                                                           | 1. One case                                                                        | FB  |
| <b>Eastwood<br/>2002</b> | Case series | Adult patients recruited from those undergoing minor surgical procedures not involving the head or neck and suitable for GA administered via a face mask | 16 adult subjects while supine and spontaneously breathing on nasal positive airway pressure                           | To measured collapsibility of upper airways in spontaneously breathing during inhalational anesthesia with isoflurane in order to examine the site and mechanism of collapse and the influence on them of anesthetic depth | Isoflurane anesthesia is associated with decreased muscle activity and increased collapsibility of the upper airway | 1. Small number of patients<br>2. Difficulties in the application of the technique | LFT |
| <b>Eastwood</b>          | Case series | Adult patients                                                                                                                                           | 12 white adult                                                                                                         | 1. To determine                                                                                                                                                                                                            | Increasing depth of                                                                                                 | 1. Small number of                                                                 | LFT |

|                 |             |                                                                                          |                            |                                                                                                                                                                                                                                                                                                                                                                |                                                                                                                                                                                            |                                                                                               |     |
|-----------------|-------------|------------------------------------------------------------------------------------------|----------------------------|----------------------------------------------------------------------------------------------------------------------------------------------------------------------------------------------------------------------------------------------------------------------------------------------------------------------------------------------------------------|--------------------------------------------------------------------------------------------------------------------------------------------------------------------------------------------|-----------------------------------------------------------------------------------------------|-----|
| 2005            |             | recruited from those undergoing minor surgical procedures not involving the head or neck | volunteers                 | <p>the effect of varying concentrations of propofol on upper airway collapsibility and the mechanisms responsible for it.</p> <p>2. To identify the effects of anesthesia on central respiratory drive to upper airway dilator muscles</p> <p>3. To determine whether a sufficient dose of propofol could produce complete flaccidity of the upper airways</p> | propofol anesthesia is associated with increase collapsibility of the upper airway                                                                                                         | <p>patients</p> <p>2. Difficulties in the application of the technique</p>                    |     |
| Hillman<br>2009 | Case series | Adult healthy volunteers                                                                 | 9 healthy adult volunteers | To determine how upper collapsibility changes during slow stepwise induction on anesthesia with propofol                                                                                                                                                                                                                                                       | The progression of effects during slow stepwise induction of anesthesia with propofol does not occur in smooth continuity but disproportionate changes in upper airway collapsibility in a | <p>1. Small number of patients</p> <p>2. Difficulties in the application of the technique</p> | LFT |

|                     |             |                                                                                                                                                                            |                                                                                                                                          |                                                                                                                                                                                                                                                                           |                                                                                                                                                                                                                                                                                                                             |                                                                                                                                                                                                                                                                                   |                 |
|---------------------|-------------|----------------------------------------------------------------------------------------------------------------------------------------------------------------------------|------------------------------------------------------------------------------------------------------------------------------------------|---------------------------------------------------------------------------------------------------------------------------------------------------------------------------------------------------------------------------------------------------------------------------|-----------------------------------------------------------------------------------------------------------------------------------------------------------------------------------------------------------------------------------------------------------------------------------------------------------------------------|-----------------------------------------------------------------------------------------------------------------------------------------------------------------------------------------------------------------------------------------------------------------------------------|-----------------|
|                     |             |                                                                                                                                                                            |                                                                                                                                          |                                                                                                                                                                                                                                                                           | narrow propofol concentrations in each subjects                                                                                                                                                                                                                                                                             |                                                                                                                                                                                                                                                                                   |                 |
| <b>Masters 2005</b> | Case series | 1. Reliability testing: children who had undergone FB for chronic cough<br>2. In vivo measurement: children who undergone FB for protracted or chronic cough and or wheeze | 1. Reliability testing: 18 children, median age 30 months, range 2-127 months<br>2. In vivo measurements: 35 children > 3 months of age. | 1. To describe a new method to define and measure airway lumen using a FB and a computer software.<br>2. Describe intra and inter-observer reliability, validation and application of the technique<br>3. Compare airway size measurements using different methodologies. | 1. Validation results showed very high levels of agreement of measurements at all distance<br>2. Good inter and intra observer reliability<br>3. The cross sectional area assessed at low light intensity is more likely to be representative of the true cross sectional area than that captured at normal operating light | Factors that govern tissue reflectance and absorption of light during the respiratory cycle while under anesthesia can be compounded by the physical effects of the instruments, the type of light, airway suctioning, and disease processes                                      | FB and computer |
| <b>Okazaki 2004</b> | Case series | Infants with and without TM                                                                                                                                                | Cases: 8 infants with TM<br>Controls: 4 infants without TM                                                                               | Static pressure/area relationships of the trachea in infants with TM were obtained and tested if the relationship quantitatively describes collapsibility of the trachea                                                                                                  | Tracheal collapsibility of infants with TM can be quantitatively assessed by the static pressure/area relationship of the trachea                                                                                                                                                                                           | 1. Insufficient control of tracheal smooth muscle tone that could be influenced by anesthesia<br>2. Overestimation of the lower airway pressure area because the collapsibility site may have shifted to the endoscope tip with the pressure decrease<br>3. Difficult to estimate | FB and LFT      |

|                         |                                  |                                                                                                           |                                                                                                                                                             |                                                                                                            |                                                                                                                                                                                         |                                                                                                                                                                                                                                                              |             |
|-------------------------|----------------------------------|-----------------------------------------------------------------------------------------------------------|-------------------------------------------------------------------------------------------------------------------------------------------------------------|------------------------------------------------------------------------------------------------------------|-----------------------------------------------------------------------------------------------------------------------------------------------------------------------------------------|--------------------------------------------------------------------------------------------------------------------------------------------------------------------------------------------------------------------------------------------------------------|-------------|
|                         |                                  |                                                                                                           |                                                                                                                                                             |                                                                                                            |                                                                                                                                                                                         | <p>the relative contribution of tracheal stenosis because the method only assesses collapsibility of the trachea</p> <p>4. Deformation of endoscopic image is inevitable for obtain a wide angle view</p> <p>5. Small number of patients</p>                 |             |
| <b>Loring 2006</b>      | Case series                      | Adult patients referred to FB for suspected TBM                                                           | <p>Patients: 80 adult patients (34 men), mean age 63 year, range 29-94 years</p> <p>Controls: 4 adult healthy volunteers (2 men, age range 33-47 years)</p> | To quantify central airway collapsibility and relate it to expiratory flow limitation in patients with TBM | In TBM central airway collapse is not closely related to airflow obstruction and expiratory flow limitation at rest often occurs in peripheral airways without central airway collapse. | <p>1. Small number of patients</p> <p>2. The trachea transmural pressure may have been affected by the presence of the bronchoscope and local anesthetic solution</p> <p>3. The method may overestimates airway size and underestimates airway narrowing</p> | FB and LFT  |
| <b>Negercham (2015)</b> | Case series. Retrospective study | Infants who had esophageal atresia who underwent MDCT as preoperative evaluation of TBM prior to artopexy | 18 children (8 male), median age 8 months, range 1month-11 years.                                                                                           | To compare MDCT with intraoperative FB in the assessment of TBM in children who had esophageal atresia     | MDCT is highly accurate and reliable non invasive modality for evaluating TBM                                                                                                           | <p>1. MDCT depends on patient cooperation.</p> <p>2. Radiation exposure</p>                                                                                                                                                                                  | MDCT and RB |
|                         | Review                           |                                                                                                           |                                                                                                                                                             |                                                                                                            |                                                                                                                                                                                         |                                                                                                                                                                                                                                                              |             |

MDCT: multidetector CT, MAVA: mediastinal aortic vascular anomalies, TM: tracheomalacia, BM: broncomalacia, VR: volume rendering, TBM: trachea bronchomalacia, CRS: chronic respiratory symptoms, RR: relative risk, TB: tracheobronchial, DAC: dynamic airway collapse, PT: proximal trachea, MT: mild

trachea, DT: distal trachea, RMSB: right main stem bronchus, LMSB: left main stem bronchus, MS: Marfan syndrome, GA: general anesthesia, LFT: lung function testing, RB: rigid bronchoscopy



## QUESTION 8

### Respiratory physiotherapy systematic search

#### Search terms

Tracheomalacia OR bronchomalacia OR tracheobronchomalacia OR malacia OR tracheal abnormalities OR tracheal diseases

**AND**

Physiotherapy OR physical therapy OR physical therapy modalities OR airway clearance OR positive pressure and physiotherapy

Exercise tolerance OR exercise therapy

Administration inhalation OR nebulisation OR saline solution hypertonic OR deoxyribonuclease I OR nebulised dornase alfa OR nebulised hypertonic saline

Tracheomalacia and physiotherapy

| Title                                                                                                          | Authors                                                            | Journal, Date                                       | DOI/PMID                       | Type                             | Language | N           |
|----------------------------------------------------------------------------------------------------------------|--------------------------------------------------------------------|-----------------------------------------------------|--------------------------------|----------------------------------|----------|-------------|
| <b>Interventions for primary (intrinsic) tracheomalacia in children</b>                                        | Masters IB, Chang AB.                                              | The Cochrane Library 2005, Issue 4                  | 10.1002/14651858.CD005304.pub2 | Systematic review                | EN       | 0 studies   |
| <b>Interventions for primary (intrinsic) tracheomalacia in children.</b>                                       | Goyal V, Masters IB, Chang AB.                                     | Cochrane Database Syst Rev. 2012 Oct 17;10:CD005304 | 10.1002/14651858.CD005304.pub3 | Systematic review                | EN       | 1 study     |
| <b>Recombinant human DNase in children with airway malacia and lower respiratory tract infection</b>           | Boogaard R, de Jongste JC, Vaessen Verberne AA, Hop WC, Merkus PJ. | Pediatr Pulmonol. 2009 Oct                          | 10.1002/ppul.21073             | RCT                              | EN       | 40          |
| <b>Positive expiratory pressure to enhance cough effectiveness in tracheomalacia</b>                           | Sirithangkul S, Ranganathan S, Robinson PJ, Robertson CF.          | J Med Assoc Thai. 2010 Nov;93 Suppl 6:S112-8.       | 21280523                       | Observational case-control study | EN       | 40          |
| <b>Effect of continuous positive airway pressure on forced expiratory flows in infants with tracheomalacia</b> | Davis S, Jones M, Kisling J, Angelicchio C, Tepper RS.             | Am J Respir Crit Care Med 1998;158:148-152          | 10.1164/ajrccm.158.1.9711034   | Observational prospective study  | EN       | 6           |
| <b>Paediatric chronic suppurative lung disease: clinical characteristics and outcomes</b>                      | Goyal V, Grimwood K Marchant JM, Masters IB, Chang AB.             | Eur J Pediatr. 2016 Aug;175(8):1077-84              | 10.1007/s00431-016-2743-5      | Retrospective study              | EN       | 22 (41% TM) |
| <b>Tracheomalacia and Tracheobronchomalacia in Children and Adults</b>                                         | Carden KA, Boiselle PM, Waltz DA, Ernst A.                         | Chest. 2005 Mar;127(3):984-1005.                    | 10.1378/chest.127.3.984        | Review                           | EN       |             |
| <b>Primary bronchomalacia in infants and children</b>                                                          | Finder JD                                                          | J Pediatr. 1997 Jan;130(1):59-66                    | 9003852                        | Retrospective study              | EN       | 17          |

LITERATURE REVIEW Tracheomalacia and physiotherapy

| 1st author, publication year | Setting; Study design            | Inclusion criteria; Exclusion or definitions                                                                                                                       | Description of cohort                                                                               | Main aim(s) of study                                                                                                                                           | Primary findings related to KQ                                                                                                                                                                                                                                                                                                     | Main study limitation                                       | Method of confirmation of TBM |
|------------------------------|----------------------------------|--------------------------------------------------------------------------------------------------------------------------------------------------------------------|-----------------------------------------------------------------------------------------------------|----------------------------------------------------------------------------------------------------------------------------------------------------------------|------------------------------------------------------------------------------------------------------------------------------------------------------------------------------------------------------------------------------------------------------------------------------------------------------------------------------------|-------------------------------------------------------------|-------------------------------|
| Finder, 1997                 | Retrospective                    | not specified                                                                                                                                                      | N = 17, mean age = 38 mo (range 3 mo - 17 y) with bronchomalacia                                    | To determine the natural history of primary bronchomalacia                                                                                                     | All patients had physiotherapy. All patients aged more than 5 years had exercise limitation                                                                                                                                                                                                                                        | Descriptive study                                           | Bronchoscopy                  |
| Goyal, 2012                  | Systematic review                | RCTs related to symptoms associated with primary or intrinsic TM                                                                                                   | 1 study examined about role of rDNase                                                               | To evaluate the efficacy of medical and surgical therapies for children with intrinsic (primary) TM                                                            | No RCTs identified about role of physiotherapy                                                                                                                                                                                                                                                                                     | Related to symptoms rather than the impact of physiotherapy | not specified                 |
| Davis, 1998                  | Cross-sectional                  | TM=50% tracheal narrowing at bronchoscopy                                                                                                                          | N = 6, mean age 6.8 mo (range 3-10 mo) with moderate to severe TM; Controls: N = 5, mean age 6.4 mo | In infants with TM, to determine whether the increase in V'max FRC with CPAP could be explained by the increase in FRC with CPAP (0, 4, 8 cm H <sub>2</sub> O) | continuous positive expiratory pressure (CPAP) increases maximal expiratory flow at functional residual capacity secondary to increasing lung volume                                                                                                                                                                               | Small cohort                                                | Bronchoscopy                  |
| Sirithangkul, 2010           | Observational case-control study | Incl. children with OA/TOF with corrective surgery; Excl. complex congenital abnormalities (spinal deformity, congenital heart disease or neurological impairment) | N = 40, mean age 12.5 y (range 8 - 18 y); Controls: N = 21, mean age 13.1 y                         | To determine the effectiveness of increasing levels of PEP during coughing to enhance expiratory flow and improve efficiency of the cough in children with TOF | <u>Children with TOF:</u> PEP=5: +18.8% increase CEF25-75<br>PEP=10: +11.7% increase CEF25-75<br>PEP=15: +0.5% increase CEF25-75<br>PEP=20: -2.4% decrease CEF25-75<br><u>Controls:</u><br>PEP=5: -3.1% decrease CEF25-75<br>PEP=10: -6.3% decrease CEF25-75<br>PEP=15: -22.2% decrease CEF25-75<br>PEP=20: -19% decrease CEF25-75 | CEF25-75 were calculated from cough flow-volume curve       | History, clinical symptoms    |

LITERATURE REVIEW QUESTION 9: STENTS

| 1 <sup>st</sup> author, publication year | Study design  | Number of patients | Type(s) of stent                   | Outcome (survival at time of report) | Complications                                                                                | Attempted stent retrieval  | Main study limitation                                |
|------------------------------------------|---------------|--------------------|------------------------------------|--------------------------------------|----------------------------------------------------------------------------------------------|----------------------------|------------------------------------------------------|
| Soong 2018                               | retrospective | unclear (>21)      | BEMS                               | unclear for TBM patients             | tracheal perforation at time of stent removal, granulation tissue, infection, stent fracture | optional                   | data combined with stenting for other indications    |
| Sztano 2016                              | retrospective | 3                  | absorbable                         | 2/3, 67%                             | stent fragmentation, infection, airway obstruction                                           | required for complications | small series presented as review of complications    |
| Anton-Pacheco 2016                       | retrospective | 3                  | absorbable                         | 3/3, 100%                            | granulation tissue                                                                           | no                         | small series                                         |
| de Trey 2016                             | retrospective | 15                 | BEMS, absorbable                   | 11/15 (73%)                          | stent fracture, infection, airway obstruction                                                | optional (28%)             | data combined with stenting for vascular compression |
| Anton-Pacheco 2008                       | retrospective | 19                 | BEMS, silicone (Dumon™, Polyflex™) | unclear for TBM patients             | stent migration, granulation tissue, infection                                               | optional                   | data combined with stenting for other indications    |
| Yang 2006                                | retrospective | 3                  | not stated                         | 1/3 (33%)                            | not stated                                                                                   | 1/3                        | small series, poor description of patients           |
| Airway Reconstruction team 2005          | retrospective | 2                  | BEMS                               | 2/2 (100%)                           | not stated                                                                                   | unclear                    | small series                                         |
| Valerie 2005                             | retrospective | 14                 | BEMS                               | 13/14 (93%)                          | death during stent removal                                                                   | 9/14 (64%)                 | small series                                         |
| Geller 2004                              | retrospective | 9                  | BEMS                               | 5/9 (55%)                            | airway haemorrhage, infection                                                                | no                         | small series                                         |
| Nicolai 2001                             | retrospective | 4                  | BEMS, SEMS                         | 1/4 (25%)                            | pneumomediastinum, difficult stent removal, granulation tissue, stent                        | yes                        | small series                                         |

|                         |               |   |                          |            |                                              |           |                                                                             |
|-------------------------|---------------|---|--------------------------|------------|----------------------------------------------|-----------|-----------------------------------------------------------------------------|
|                         |               |   |                          |            | collapse with coughing<br>granulation tissue |           |                                                                             |
| <b>Furman<br/>1999</b>  | retrospective | 2 | BEMS                     | 1/2 (50%)  |                                              | no        | small series                                                                |
| <b>Filler 1998</b>      | retrospective | 8 | BEMS                     | 8/8 (100%) | granulation tissue                           | 6/8 (75%) | small series                                                                |
| <b>Tsugawa<br/>1997</b> | retrospective | 2 | SEMS                     | 2/2 (100%) | stent too short                              | 1/2 (50%) | small series,<br>experimental device<br>(not available for<br>clinical use) |
| <b>Santoro<br/>1995</b> | retrospective | 3 | BEMS                     | 1/3 (33%)  |                                              | no        | small series                                                                |
| <b>Mair 1990</b>        | retrospective | 2 | SEMS, plastic<br>polymer | 1/2 (50%)  | infection                                    | no        | small series,<br>experimental device<br>(not available for<br>clinical use) |

TBM = tracheobronchomalacia; BEMS = balloon-expandable metal stent; SEMS = self-expanding metal stent

# LITERATURE REVIEW: QUESTION 9 - SURGERY

| 1 <sup>st</sup> author, publication year | Setting; Study design | Inclusion criteria                                                                                                  | Description of cohort                            | Main aim(s) of study                                                                                                                              | Primary findings relating to KQ                                                                                                 | Main study limitation                                                                                                      | Method of confirmation of TBM and type                    |
|------------------------------------------|-----------------------|---------------------------------------------------------------------------------------------------------------------|--------------------------------------------------|---------------------------------------------------------------------------------------------------------------------------------------------------|---------------------------------------------------------------------------------------------------------------------------------|----------------------------------------------------------------------------------------------------------------------------|-----------------------------------------------------------|
| Jennings 2014                            | Retro-spective cohort | children with TM who underwent aortopexy                                                                            | N=41<br>median age- 7.5 mo<br>(range 1-136)      | To determine the outcomes among three different surgical approaches for performing an aortopexy                                                   | The partial sternotomy technique had the most reliable resolution of symptoms and no recurrence requiring reoperation.          | Variation in patient populations, ages at operation, surgical teams, use of intraoperative bronchoscopy to assess results. | Flexible bronchoscopy, spontaneous breathing              |
| Briganti 2006                            | Retro-Spective cohort | children with esophageal atresia-tracheoesophageal fistula presenting segmentary TM                                 | 7 children<br>Mean age: 25.2 mo<br>(range 2-103) | Usefulness of preoperative imaging by dynamic fiberoptic bronchoscopy and spiral multilayer computed tomography with 3-dimensional reconstruction | Dynamic fiberoptic bronchoscopy and CT scans allowed us to describe 3 morphological variations of thoracic TM                   | Short series of cases                                                                                                      | Flexible bronchoscopy and CT scan with 3-D reconstruction |
| Filler 1992                              | Retro-Spective cohort | children with esophageal atresia tracheoesophageal fistula (EA-TEF) who underwent surgery for severe tracheomalacia | 32 children                                      | Surgical outcomes of aortopexy                                                                                                                    | Aortopexy provides long-term relief of severe symptoms of tracheomalacia associated with EA-TEF in almost all affected children |                                                                                                                            | Chest x-ray, esophagogram, and bronchoscopy.              |
| Morabito 2000                            | Cohort                | children with significant symptoms of TM undergoing aortopexy and/or tracheopexy                                    | 16 children                                      | Surgical outcomes of aortopexy and/or tracheopexy                                                                                                 | Sustained tracheal improvement and resolution of the life-threatening features of TM                                            |                                                                                                                            | Bronchoscopy (type undefined)                             |
| Arnaud                                   | Case study            | Children with TM                                                                                                    | 4 children                                       | To review initial experience                                                                                                                      | All patients were relieved of                                                                                                   | larger and                                                                                                                 | Bronchoscopy                                              |

|               |                       |                                                                                                |                                                 |                                                                                                                |                                                                                                                                                                                                       |                                                                                                                                                                        |                                                                                        |
|---------------|-----------------------|------------------------------------------------------------------------------------------------|-------------------------------------------------|----------------------------------------------------------------------------------------------------------------|-------------------------------------------------------------------------------------------------------------------------------------------------------------------------------------------------------|------------------------------------------------------------------------------------------------------------------------------------------------------------------------|----------------------------------------------------------------------------------------|
| 2014          |                       | and EA/TEF undergoing thorascocic aortopexy                                                    |                                                 | with thoracoscopic aortopexy.                                                                                  | their symptoms, and no recurrence was noted.                                                                                                                                                          | prospective study with a longer follow-up to confirm these preliminary results, needed                                                                                 |                                                                                        |
| Shieh 2017    | Retro-spective cohort | Children undergoing posterior tracheopexy for tracheomalacia with posterior intrusion          | 98 patients median age of 15mo (IQR 6-33months) | To review patient outcomes of posterior tracheopexy for tracheomalacia                                         | Tracheomalacia scores on bronchoscopy improved significantly in all regions of the trachea and bronchi (p<0.001). 9.2% had persistent airway intrusion requiring reoperation, usually with aortopexy. |                                                                                                                                                                        | Flexible bronchoscopy with standardized dynamic airway evaluation by anatomical region |
| Morrison 2015 | Case study            | 3 children with severe TBM treated with a 3D-printed personalized bioresorbable medical device | 3 children                                      | Assess the application of 3D printing technology to produce a personalized medical device for treatment of TBM | These infants no longer exhibited life-threatening airway disease and demonstrated resolution of both pulmonary and extra-pulmonary complications of their TBM.                                       | This report was not designed for definitive testing of device safety. Further patient accrument and analysis under a US/ FDA-enabled clinical trial will be necessary. | Bronchoscopy and CT scan with multiplanar reconstruction                               |

## PATIENT AND PARENT PERPECTIVE

### HTTPS links to internet sources

1. Mumsnet thread: "Anyone's newborn suffered from laryngeal stridor?". 2011. Accessed 5 April 2018. [https://www.mumsnet.com/Talk/childrens\\_health/1123789-Anyones-newborn-suffered-from-laryngeal-stridor](https://www.mumsnet.com/Talk/childrens_health/1123789-Anyones-newborn-suffered-from-laryngeal-stridor)
2. Mumsnet thread "floppy windpipe". 2005. Accessed 5 April 2018. [https://www.mumsnet.com/Talk/general\\_health/63818-floppy-windpipe](https://www.mumsnet.com/Talk/general_health/63818-floppy-windpipe)
3. Mumsnet thread "any experts on breathing problems in small babies?". 2009. Accessed 5 April 2018. [https://www.mumsnet.com/Talk/childrens\\_health/694506-any-experts-on-breathing-problems-in-small-babies](https://www.mumsnet.com/Talk/childrens_health/694506-any-experts-on-breathing-problems-in-small-babies)
4. Baby Center Community thread "Tracheomalacia". 2010. Accessed 6 April 2018. <https://community.babycenter.com/post/a21491171/tracheomalacia>
5. Mumsnet thread "laryngomalacia in newborn; anyone any advice please?". 2006. Accessed 5 April 2018. [https://www.mumsnet.com/Talk/general\\_health/137371-laryngomalacia-in-newborn-anyone-any-advice-please](https://www.mumsnet.com/Talk/general_health/137371-laryngomalacia-in-newborn-anyone-any-advice-please)
6. Mumsnet thread "My 4 month old diagnosed with laryngeal or trachea malacia - anyone got any experience?". 2009 - 2011. Accessed 5 April 2018. [https://www.mumsnet.com/Talk/childrens\\_health/714854-My-4-month-old-diagnosed-with-laryngeal-or-trachea-malacia](https://www.mumsnet.com/Talk/childrens_health/714854-My-4-month-old-diagnosed-with-laryngeal-or-trachea-malacia)
7. Megan Horwath. I Know You, Tracheomalacia. The Mighty. 2015. Accessed 6 April 2018. <https://themighty.com/2015/03/i-know-you-tracheomalacia/>
8. MedHelp thread "Tracheal-Malaysia". 2011. Accessed 5 April 2018. [https://www.medhelp.org/posts/Ear--Nose--Throat/TRACHEAL-MALAYSIA/show/7360#post\\_7143465](https://www.medhelp.org/posts/Ear--Nose--Throat/TRACHEAL-MALAYSIA/show/7360#post_7143465)
9. Mamapedia thread "How to deal with infant with tracheomalacia?". 2008. Accessed 6 April 2018. <https://www.mamapedia.com/article/how-to-deal-with-infant-with-tracheomalacia>
